# Supplementary material for: A cardiovascular disease policy model: part 2—preparing for economic evaluation and to assess health inequalities
Source: PubMed Central journal article supplement (PMC4908904; doi:10.1136/openhrt-2014-000140), 2016-06-10
Supplement: openhrt-2014-000140supp.pdf [file openhrt-2014-000140supp.pdf]

## On-line appendix: An alternative Cardiovascular Disease Policy Model

This appendix provides technical details of our model and is intended to be read in conjunction with the twinned papers<sup>1-2</sup>.

### Estimating risk of having first event (part 1 paper)

Gompertz regression survival analysis was used to model the cause specific hazards of the competing first events (non-fatal coronary heart disease (CHD), non-fatal cerebrovascular disease (CBVD), fatal CVD, fatal non-CVD). The model results are shown in Table A1. The model results are shown in Table A1. The associated Choleskey decomposition matrixes are shown in Tables A13-A20.

The following was derived from section 3.2 in Putter *et al.* using parametric expressions for the cause specific hazards<sup>3</sup>. The predicted cumulative incidence estimates of first events can be obtained from the Gompertz regression as follows:

$$CI_k(t) = \sum p_k(t_j)$$

i.e., the cumulative incidence at time  $t$ ,  $CI_k(t)$ , is the cumulative sum of the unconditional probabilities of having event type  $k$  at time  $t_j$ ,  $\sum p_k(t_j)$ , up to and including time  $t$ . The unconditional probabilities are obtained by:

$$p_k(t_j) = h_k(t_j)S(t_{j-1})$$

Where  $h_k(t_j)$  is the cause specific hazard for event type  $k$  which for the Gompertz regression has the expression:

$$h_k(t_j) = \exp(xb)\exp(\gamma t)$$

Where  $xb$  is the linear predictor from the regression and  $\gamma$  is the ancillary shape parameter estimated from the data.  $S(t)$  is the probability of surviving from any of the four events at time  $t$  and is obtained by:

$$S(t) = \prod(1 - \sum h_k(t_j))$$

Where  $\sum h_k(t_j)$  is the sum of the four cause specific hazards at time  $t_j$ .

Figure 2a in the part 1 paper displays  $CI_k(t)$  and  $S(t)$  for a particular covariate profile. Figure 3b in the part 1 paper shows the  $p_k(t_j)$  for the same covariate profile.

### **Estimating life expectancy following non-fatal CHD and CBVD events (part 1 paper)**

Gompertz regression was also used to model the hazard of death following a first non-fatal event. The model results are shown in Table A2. The associated Choleskey decomposition matrixes are shown in Tables A21-A24. A predicted survival curve extrapolated until the probability of surviving beyond that time point was zero can be obtained for each covariate profile. Figures 2b-2d in the part 1 paper show predicted survival curves for a particular covariate profile with different ages at first event. The area under the survival curve was obtained by applying the trapezoidal rule with half cycle correction and this provided an estimate of remaining life expectancy.

### **Estimating background morbidity (part 2 paper)**

Table A3 shows the mean HRQoL scores by age and socio-economic deprivation groups in the Scottish Health Survey (SHeS) 2003 data set. These scores are used to weight survival probabilities in all arms of the model (see Figure 1 in part 2 paper).

### **Estimating utility decrements (part 2 paper)**

SHeS 2003 data was also used to estimate utility decrements that are associated with CHD, stroke, intermittent claudication and other CVD events. SHeS participants were asked if a doctor had diagnosed any of these events in the past. Table A4 shows the linear regression results from modelling HRQoL scores using the above events as covariates (and age). A history of heart failure (HF) was not part of the SHeS questionnaire and so a decrement for HF events was taken from the literature<sup>4</sup>.

### **Estimating annual probability of incurring events that will have utility decrement applied (part 2 paper)**

As part of the process for quality adjusting life years it was necessary to model the probability of non-fatal CVD events identified in the last section that occur after the first non-fatal events. Using the linked Scottish Heart Health Extended Cohort (SHHEC) and Scottish Morbidity Records (SMR) data set, the proportions of patients who had these events recorded in hospital discharge diagnosis fields for every year since the first event were calculated involving all

patients who were alive at the start of the given year. If a patient was alive in a given year but had no hospitalisation then a zero was added to the proportion calculation. To illustrate, Figure A1 shows for men the observed proportions of HF hospitalisations over time since first event.

Expected proportions of non-fatal CVD events have to be obtained beyond the observed follow-up period. A restricted cubic spline (RCS) function (with 3 knots based on Harrell's recommended percentiles<sup>5</sup>) was used to represent years since first event and included in a probit regression alongside age at first event, family history and socio-economic status. A RCS method was adopted as the shape of the function is less influenced at the edges of the data than say a fractional polynomial approach. This is particularly important in this setting where the time function is being extrapolated beyond the observed follow-up period.

Then, to calculate the expected probabilities of non-fatal CVD events of type  $i$  at each model cycle (year)  $t$ ,  $p_{it}$ , the regression coefficients are transformed to the probability scale:

$$p_{it} = F(xb_i(t))$$

where  $F$  is the cumulative standard Normal distribution and  $xb_i(t)$  is the linear predictor from the probit regression for event type  $i$  at time period  $t$ . The estimated coefficients from the regression models can be found in Table A5. The associated Choleskey decomposition matrixes are shown in Tables A25-A45.

### **Estimating quality adjustment (part 2 paper)**

To quality adjust, the expected dis-utility was obtained using a Kaplan-Meier sample average (KMSA) approach which is essentially a sum over time of the probability of surviving post first event at a given time point multiplied by the mean dis-utility at that time point. For men this is given by:

$$\begin{aligned} \text{Expected dis-utility} = \sum S(t) & [(0.043 \times p_{i=CHD,t}) + (0.092 \times p_{i=Stroke,t}) + (0.025 \times p_{i=Int. Claud.,t}) \\ & + (0.043 \times p_{i=Oth. heart cond.,t}) + (0.1 \times p_{i=HF.,t})] \end{aligned}$$

where  $S(t)$  is survival probability after first event, the values (0.043, 0.092, etc.) are the utility decrements (see Table A4) and  $p_{i=<event>,t}$  are the probabilities of non-fatal CVD events (see last section).

Figure 2 in the part 2 paper illustrates the process of quality adjustment for a particular covariate profile after a non-fatal CHD event. The grey bars represent the mean dis-utility at each time point and the curve is the survival probability after non-fatal CHD event.

### **Estimating lifetime health service costs (part 2 paper)**

Costs were modelled both pre- and post-first events. If a patient was alive in a given year but had no hospitalisation then a zero was added to the proportion calculation. To illustrate, Figures A2 and A3 show for men the observed costs over time before and after first event, respectively. As for non-fatal CVD events, expected costs have to be obtained beyond the observed follow-up period and therefore a RCS approach was again adopted. Costs were modelled using linear regression with spline functions representing time, age at survey (for pre-first event models), age at first event (for post-first event models), family history and socio-economic status. The estimated coefficients from the regression models can be found in Table A6. The associated Cholesky decomposition matrixes are shown in Tables A46- A57.

Expected costs are estimated using the KMSE approach as in the last section:

$$\text{Expected cost} = \sum S(t)xb(t)$$

For expected costs before first events,  $S(t)$  is the probability of surviving from any of the four events at time  $t$  and  $xb(t)$  is the linear predictor from the appropriate regression pre-first event model at time period  $t$ . For expected costs after first events,  $S(t)$  is the probability of surviving post first event at time  $t$  and  $xb(t)$  is the linear predictor from the appropriate regression post-first event model at time period  $t$ .

Figure 3 in the part 2 paper illustrates the process of estimating lifetime health service costs for a particular covariate profile after a non-fatal CHD event. The grey bars represent the mean costs at each time point and the curve is the survival probability after non-fatal CHD event.

Table A1: Gompertz regression modelling of cause specific hazards of first event

a) Men

| Covariate | non-fatal CHD           |         | non-fatal CBVD          |         | fatal CVD               |         | fatal non-CVD           |         |
|-----------|-------------------------|---------|-------------------------|---------|-------------------------|---------|-------------------------|---------|
|           | coeff. (95% CI)         | p value | coeff. (95% CI)         | p value | coeff. (95% CI)         | p value | coeff. (95% CI)         | p value |
| Age       | 0.045 (0.038, 0.052)    | <0.001  | 0.066 (0.054, 0.078)    | <0.001  | 0.093 (0.082, 0.103)    | <0.001  | 0.094 (0.085, 0.102)    | <0.001  |
| SIMD sc.  | 0.004 (0.001, 0.007)    | 0.002   | 0.009 (0.005, 0.014)    | <0.001  | 0.006 (0.003, 0.010)    | <0.001  | 0.009 (0.007, 0.012)    | <0.001  |
| Diabetes  | 0.653 (0.292, 1.014)    | <0.001  | 1.168 (0.664, 1.673)    | <0.001  | 0.863 (0.389, 1.337)    | <0.001  | 0.335 (-0.169, 0.839)   | 0.192   |
| Fam. his. | 0.408 (0.295, 0.522)    | <0.001  | -0.021 (-0.235, 0.193)  | 0.847   | 0.165 (-0.003, 0.332)   | 0.054   | -0.015 (-0.162, 0.133)  | 0.845   |
| CPD       | 0.018 (0.013, 0.022)    | <0.001  | 0.024 (0.017, 0.031)    | <0.001  | 0.031 (0.026, 0.037)    | <0.001  | 0.031 (0.026, 0.035)    | <0.001  |
| SBP       | 0.008 (0.005, 0.011)    | <0.001  | 0.012 (0.007, 0.016)    | <0.001  | 0.015 (0.012, 0.019)    | <0.001  | -0.001 (-0.005, 0.002)  | 0.391   |
| TC        | 0.255 (0.208, 0.302)    | <0.001  | 0.083 (-0.002, 0.168)   | 0.056   | 0.120 (0.050, 0.189)    | 0.001   | -0.051 (-0.111, 0.008)  | 0.092   |
| HDL       | -0.760 (-0.947, -0.574) | <0.001  | -0.125 (-0.394, 0.144)  | 0.362   | -0.143 (-0.370, 0.085)  | 0.218   | 0.384 (0.214, 0.554)    | <0.001  |
| Constant  | -9.54 (-10.12, -8.96)   | <0.001  | -12.51 (-13.47, -11.54) | <0.001  | -14.13 (-14.93, -13.33) | <0.001  | -11.22 (-11.91, -10.53) | <0.001  |
| Gamma     | 0.057 (0.049, 0.065)    | <0.001  | 0.091 (0.076, 0.105)    | <0.001  | 0.079 (0.068, 0.091)    | <0.001  | 0.081 (0.071, 0.091)    | <0.001  |

b) Women

| Covariate | non-fatal CHD           |         | non-fatal CBVD          |         | fatal CVD               |         | fatal non-CVD           |         |
|-----------|-------------------------|---------|-------------------------|---------|-------------------------|---------|-------------------------|---------|
|           | coeff. (95% CI)         | p value | coeff. (95% CI)         | p value | coeff. (95% CI)         | p value | coeff. (95% CI)         | p value |
| Age       | 0.058 (0.049, 0.067)    | <0.001  | 0.080 (0.065, 0.095)    | <0.001  | 0.102 (0.087, 0.116)    | <0.001  | 0.091 (0.081, 0.101)    | <0.001  |
| SIMD sc.  | 0.009 (0.006, 0.012)    | <0.001  | 0.013 (0.009, 0.018)    | <0.001  | 0.004 (0.000, 0.009)    | 0.054   | 0.007 (0.004, 0.010)    | <0.001  |
| Diabetes  | 0.725 (0.343, 1.108)    | <0.001  | 1.101 (0.595, 1.607)    | <0.001  | 1.144 (0.680, 1.609)    | <0.001  | -0.037 (-0.668, 0.594)  | 0.908   |
| Fam. his. | 0.516 (0.389, 0.643)    | <0.001  | 0.356 (0.150, 0.562)    | 0.001   | 0.239 (0.050, 0.428)    | 0.013   | -0.018 (-0.165, 0.129)  | 0.814   |
| CPD       | 0.021 (0.014, 0.027)    | <0.001  | 0.027 (0.017, 0.037)    | <0.001  | 0.048 (0.040, 0.056)    | <0.001  | 0.038 (0.032, 0.044)    | <0.001  |
| SBP       | 0.006 (0.003, 0.009)    | <0.001  | 0.014 (0.009, 0.018)    | <0.001  | 0.018 (0.013, 0.022)    | <0.001  | 0.003 (-0.001, 0.006)   | 0.112   |
| TC        | 0.188 (0.136, 0.240)    | <0.001  | -0.051 (-0.150, 0.048)  | 0.308   | 0.057 (-0.022, 0.136)   | 0.159   | -0.076 (-0.140, -0.013) | 0.018   |
| HDL       | -0.746 (-0.937, -0.555) | <0.001  | -0.346 (-0.636, -0.056) | 0.020   | -0.174 (-0.420, 0.073)  | 0.166   | -0.045 (-0.229, 0.138)  | 0.626   |
| Constant  | -10.52 (-11.14, -9.89)  | <0.001  | -13.01 (-14.02, -12.00) | <0.001  | -15.42 (-16.39, -14.46) | <0.001  | -11.26 (-11.93, -10.58) | <0.001  |
| Gamma     | 0.083 (0.073, 0.093)    | <0.001  | 0.096 (0.080, 0.112)    | <0.001  | 0.099 (0.084, 0.114)    | <0.001  | 0.089 (0.078, 0.099)    | <0.001  |

Note: 'Age' is age at survey

Table A2: Gompertz regression modelling of survival after non-fatal event

a) Men, after CHD event

| Covariate      | coeff. (95% CI)         | p value |
|----------------|-------------------------|---------|
| Age at event   | 0.077 (0.065, 0.090)    | <0.001  |
| SIMD score     | 0.013 (0.009, 0.017)    | <0.001  |
| Family history | -0.035 (-0.233, 0.162)  | 0.725   |
| Constant       | -8.597 (-9.479, -7.715) | <0.001  |
| Gamma          | 0.038 (0.017, 0.059)    | <0.001  |

b) Men, after CBVD event

| Covariate      | coeff. (95% CI)         | p value |
|----------------|-------------------------|---------|
| Age at event   | 0.067 (0.048, 0.087)    | <0.001  |
| SIMD score     | 0.009 (0.003, 0.015)    | 0.004   |
| Family history | 0.061 (-0.263, 0.385)   | 0.711   |
| Constant       | -7.447 (-8.852, -6.043) | <0.001  |
| Gamma          | 0.024 (-0.015, 0.062)   | 0.226   |

c) Women, after CHD event

| Covariate      | coeff. (95% CI)         | p value |
|----------------|-------------------------|---------|
| Age at event   | 0.074 (0.059, 0.089)    | <0.001  |
| SIMD score     | 0.007 (0.003, 0.012)    | 0.003   |
| Family history | -0.285 (-0.519, -0.051) | 0.017   |
| Constant       | -8.360 (-9.488, -7.232) | <0.001  |
| Gamma          | 0.041 (0.013, 0.068)    | 0.004   |

d) Women, after CBVD event

| Covariate      | coeff. (95% CI)         | p value |
|----------------|-------------------------|---------|
| Age at event   | 0.070 (0.050, 0.089)    | <0.001  |
| SIMD score     | 0.0002 (-0.007, 0.008)  | 0.961   |
| Family history | 0.181 (-0.152, 0.513)   | 0.287   |
| Constant       | -7.668 (-9.192, -6.144) | <0.001  |
| Gamma          | 0.036 (-0.008, 0.080)   | 0.106   |

Table A3: Mean (and 95% CI) HRQoL scores in the general Scottish population by age group and fifths of SIMD group

a) Men

| Age group (years) | SIMD 1<br>least deprived | SIMD 2                  | SIMD 3                  | SIMD 4                  | SIMD 5<br>most deprived |
|-------------------|--------------------------|-------------------------|-------------------------|-------------------------|-------------------------|
| <25               | 0.822<br>(0.787, 0.857)  | 0.853<br>(0.824, 0.881) | 0.834<br>(0.795, 0.873) | 0.857<br>(0.828, 0.887) | 0.787<br>(0.745, 0.830) |
| 25-34             | 0.848<br>(0.826, 0.871)  | 0.849<br>(0.830, 0.867) | 0.823<br>(0.796, 0.850) | 0.816<br>(0.794, 0.839) | 0.774<br>(0.741, 0.807) |
| 35-44             | 0.834<br>(0.816, 0.852)  | 0.838<br>(0.820, 0.855) | 0.823<br>(0.805, 0.841) | 0.811<br>(0.787, 0.835) | 0.777<br>(0.744, 0.810) |
| 45-54             | 0.825<br>(0.805, 0.845)  | 0.827<br>(0.806, 0.849) | 0.808<br>(0.783, 0.833) | 0.791<br>(0.756, 0.826) | 0.762<br>(0.729, 0.794) |
| 55-64             | 0.845<br>(0.826, 0.865)  | 0.803<br>(0.780, 0.826) | 0.820<br>(0.796, 0.843) | 0.782<br>(0.751, 0.813) | 0.718<br>(0.680, 0.757) |
| 65-74             | 0.813<br>(0.784, 0.841)  | 0.822<br>(0.791, 0.853) | 0.802<br>(0.775, 0.830) | 0.761<br>(0.729, 0.792) | 0.732<br>(0.697, 0.768) |
| 75+               | 0.797<br>(0.750, 0.843)  | 0.802<br>(0.770, 0.835) | 0.756<br>(0.722, 0.791) | 0.775<br>(0.731, 0.818) | 0.732<br>(0.685, 0.779) |

b) Women

| Age group (years) | SIMD 1<br>least deprived | SIMD 2                  | SIMD 3                  | SIMD 4                  | SIMD 5<br>most deprived |
|-------------------|--------------------------|-------------------------|-------------------------|-------------------------|-------------------------|
| <25               | 0.846<br>(0.813, 0.880)  | 0.810<br>(0.779, 0.842) | 0.780<br>(0.739, 0.821) | 0.799<br>(0.765, 0.832) | 0.816<br>(0.787, 0.845) |
| 25-34             | 0.839<br>(0.822, 0.856)  | 0.816<br>(0.795, 0.836) | 0.822<br>(0.803, 0.841) | 0.803<br>(0.780, 0.825) | 0.775<br>(0.749, 0.800) |
| 35-44             | 0.837<br>(0.823, 0.852)  | 0.827<br>(0.812, 0.841) | 0.794<br>(0.773, 0.815) | 0.788<br>(0.769, 0.808) | 0.748<br>(0.722, 0.774) |
| 45-54             | 0.827<br>(0.812, 0.843)  | 0.793<br>(0.773, 0.812) | 0.780<br>(0.758, 0.802) | 0.769<br>(0.745, 0.792) | 0.736<br>(0.708, 0.764) |
| 55-64             | 0.835<br>(0.816, 0.854)  | 0.815<br>(0.798, 0.832) | 0.791<br>(0.768, 0.814) | 0.769<br>(0.742, 0.796) | 0.701<br>(0.670, 0.732) |
| 65-74             | 0.827<br>(0.803, 0.851)  | 0.803<br>(0.776, 0.830) | 0.792<br>(0.766, 0.818) | 0.742<br>(0.709, 0.776) | 0.702<br>(0.668, 0.736) |
| 75+               | 0.741<br>(0.702, 0.779)  | 0.765<br>(0.732, 0.798) | 0.715<br>(0.681, 0.748) | 0.693<br>(0.655, 0.731) | 0.689<br>(0.652, 0.726) |

Table A4: Event utility decrements

a) Men

| Covariate                 | coeff. (95% CI)       | p value |
|---------------------------|-----------------------|---------|
| CHD                       | 0.043 (0.019, 0.068)  | 0.001   |
| Stroke                    | 0.092 (0.061, 0.122)  | <0.001  |
| Intermittent claudication | 0.025 (-0.005, 0.056) | 0.101   |
| Other heart condition     | 0.043 (0.011, 0.074)  | 0.008   |

b) Women

| Covariate                 | coeff. (95% CI)       | p value |
|---------------------------|-----------------------|---------|
| CHD                       | 0.037 (0.007, 0.067)  | 0.016   |
| Stroke                    | 0.097 (0.067, 0.127)  | <0.001  |
| Intermittent claudication | 0.017 (-0.009, 0.043) | 0.211   |
| Other heart condition     | 0.023 (-0.011, 0.058) | 0.188   |



Table A5: Modelling the probability of non-fatal CVD events after first non-fatal event

a) Men, after CHD event

| Covariate | CHD                     |         | Stroke                  |         | Inter. claudication     |         | Other heart condition   |         |
|-----------|-------------------------|---------|-------------------------|---------|-------------------------|---------|-------------------------|---------|
|           | coeff. (95% CI)         | p value | coeff. (95% CI)         | p value | coeff. (95% CI)         | p value | coeff. (95% CI)         | p value |
| ti1       | -0.019 (-0.040, 0.002)  | 0.073   | -0.101 (-0.147, -0.055) | <0.001  | -0.049 (-0.104, 0.006)  | 0.080   | -0.060 (-0.091, -0.028) | <0.001  |
| ti2       | 0.071 (0.045, 0.098)    | <0.001  | 0.098 (0.035, 0.161)    | 0.002   | 0.034 (-0.039, 0.107)   | 0.363   | 0.050 (0.008, 0.092)    | 0.019   |
| Age       | 0.010 (0.005, 0.016)    | <0.001  | 0.001 (-0.007, 0.009)   | 0.821   | -0.001 (-0.012, 0.010)  | 0.888   | 0.005 (-0.002, 0.013)   | 0.150   |
| SIMD sc.  | 0.003 (0.001, 0.005)    | 0.004   | 0.003 (0.000, 0.007)    | 0.051   | 0.002 (-0.003, 0.006)   | 0.444   | 0.003 (0.001, 0.006)    | 0.012   |
| Fam. his. | 0.106 (0.019, 0.193)    | 0.016   | -0.011 (-0.168, 0.145)  | 0.886   | -0.136 (-0.350, 0.077)  | 0.211   | 0.174 (0.051, 0.297)    | 0.006   |
| Constant  | -2.012 (-2.420, -1.605) | <0.001  | -2.085 (-2.640, -1.530) | <0.001  | -2.137 (-2.903, -1.371) | <0.001  | -2.187 (-2.680, -1.693) | <0.001  |

| Covariate | HF                      |         |
|-----------|-------------------------|---------|
|           | coeff. (95% CI)         | p value |
| ti1       | -0.152 (-0.195, -0.110) | <0.001  |
| ti2       | 0.160 (0.098, 0.223)    | <0.001  |
| Age       | 0.014 (0.004, 0.023)    | 0.004   |
| SIMD sc.  | 0.002 (-0.002, 0.006)   | 0.297   |
| Fam. his. | 0.044 (-0.121, 0.210)   | 0.599   |
| Constant  | -2.626 (-3.260, -1.992) | <0.001  |

b) Men, after CBVD event

| Covariate | CHD                     |         | Stroke                  |         | Inter. claudication     |         | Other heart condition   |         |
|-----------|-------------------------|---------|-------------------------|---------|-------------------------|---------|-------------------------|---------|
|           | coeff. (95% CI)         | p value | coeff. (95% CI)         | p value | coeff. (95% CI)         | p value | coeff. (95% CI)         | p value |
| ti1       | -0.069 (-0.150, 0.012)  | 0.095   | -0.035 (-0.087, 0.017)  | 0.183   | 0.020 (-0.085, 0.125)   | 0.712   | -0.070 (-0.134, -0.006) | 0.032   |
| ti2       | 0.063 (-0.049, 0.174)   | 0.270   | 0.046 (-0.030, 0.123)   | 0.235   | -0.108 (-0.305, 0.090)  | 0.285   | 0.077 (-0.016, 0.170)   | 0.103   |
| Age       | -0.003 (-0.016, 0.010)  | 0.613   | 0.010 (-0.001, 0.021)   | 0.075   | 0.001 (-0.016, 0.019)   | 0.873   | 0.004 (-0.009, 0.017)   | 0.537   |
| SIMD sc.  | -0.002 (-0.008, 0.004)  | 0.455   | 0.003 (-0.000, 0.006)   | 0.073   | 0.007 (0.001, 0.014)    | 0.030   | 0.002 (-0.002, 0.007)   | 0.315   |
| Fam. his. | 0.144 (-0.085, 0.373)   | 0.218   | 0.019 (-0.154, 0.191)   | 0.833   | 0.024 (-0.340, 0.389)   | 0.895   | 0.053 (0.169, 0.275)    | 0.641   |
| Constant  | -1.506 (-2.420, -1.605) | 0.001   | -2.109 (-2.891, -1.327) | <0.001  | -2.744 (-4.034, -1.454) | <0.001  | -1.923 (-2.789, -1.058) | <0.001  |

| Covariate | HF                      |         |
|-----------|-------------------------|---------|
|           | coeff. (95% CI)         | p value |
| ti1       | -0.129 (-0.275, 0.017)  | 0.083   |
| ti2       | 0.159 (-0.021, 0.340)   | 0.084   |
| Age       | 0.039 (0.009, 0.070)    | 0.012   |
| SIMD sc.  | -0.010 (-0.021, 0.001)  | 0.079   |
| Fam. his. | 0.353 (-0.063, 0.770)   | 0.097   |
| Constant  | -4.697 (-6.983, -2.410) | <0.001  |

c) Women, after CHD event

| Covariate | CHD                     |         | Stroke                  |         | Inter. claudication     |         | Other heart condition   |         |
|-----------|-------------------------|---------|-------------------------|---------|-------------------------|---------|-------------------------|---------|
|           | coeff. (95% CI)         | p value | coeff. (95% CI)         | p value | coeff. (95% CI)         | p value | coeff. (95% CI)         | p value |
| ti1       | -0.003 (-0.033, 0.027)  | 0.823   | -0.072 (-0.144, 0.000)  | 0.051   | -0.078 (-0.152, -0.004) | 0.040   | -0.045 (-0.087, -0.003) | 0.037   |
| ti2       | 0.057 (0.011, 0.103)    | 0.016   | 0.026 (-0.102, 0.155)   | 0.688   | 0.106 (-0.015, 0.228)   | 0.086   | 0.026 (-0.045, 0.096)   | 0.477   |
| Age       | 0.010 (0.004, 0.016)    | 0.002   | 0.007 (-0.006, 0.019)   | 0.281   | 0.016 (-0.001, 0.033)   | 0.061   | 0.012 (0.003, 0.021)    | 0.009   |
| SIMD sc.  | 0.001 (-0.001, 0.004)   | 0.198   | 0.005 (0.001, 0.009)    | 0.014   | 0.001 (-0.005, 0.008)   | 0.705   | 0.001 (-0.002, 0.004)   | 0.484   |
| Fam. his. | 0.056 (-0.046, 0.158)   | 0.279   | -0.014 (-0.221, 0.194)  | 0.898   | -0.129 (-0.379, 0.122)  | 0.314   | -0.138 (-0.270, -0.005) | 0.041   |
| Constant  | -2.137 (-2.580, -1.694) | <0.001  | -2.638 (-3.492, -1.783) | <0.001  | -3.274 (-4.558, -1.990) | <0.001  | -2.407 (-3.00, -1.810)  | <0.001  |

| Covariate | HF                      |         |
|-----------|-------------------------|---------|
|           | coeff. (95% CI)         | p value |
| ti1       | -0.119 (-0.176, -0.061) | <0.001  |
| ti2       | 0.133 (0.039, 0.227)    | 0.005   |
| Age       | 0.018 (0.00, 0.029)     | 0.003   |
| SIMD sc.  | 0.004 (-0.000, 0.009)   | 0.077   |
| Fam. his. | -0.038 (-0.246, 0.170)  | 0.721   |
| Constant  | -3.017 (-3.857, -2.177) | <0.001  |

d) Women, after CBVD event

| Covariate | CHD                     |         | Stroke                  |         | Inter. claudication    |         | Other heart condition   |         |
|-----------|-------------------------|---------|-------------------------|---------|------------------------|---------|-------------------------|---------|
|           | coeff. (95% CI)         | p value | coeff. (95% CI)         | p value | coeff. (95% CI)        | p value | coeff. (95% CI)         | p value |
| ti1       | 0.078 (-0.028, 0.183)   | 0.150   | -0.023 (-0.077, 0.030)  | 0.392   | 0.008 (-0.137, 0.152)  | 0.916   | -0.053 (-0.138, 0.032)  | 0.222   |
| ti2       | -0.088 (-0.225, 0.049)  | 0.209   | 0.056 (-0.020, 0.132)   | 0.150   | -0.069 (-0.275, 0.137) | 0.513   | 0.034 (-0.071, 0.140)   | 0.524   |
| Age       | -0.0004 (-0.014, 0.013) | 0.951   | 0.022 (0.013, 0.030)    | <0.001  | -0.011 (-0.031, 0.009) | 0.279   | 0.006 (-0.005, 0.017)   | 0.302   |
| SIMD sc.  | 0.004 (-0.003, 0.011)   | 0.304   | 0.001 (-0.002, 0.004)   | 0.525   | 0.0004 (-0.013, 0.014) | 0.955   | -0.001 (-0.006, 0.004)  | 0.749   |
| Fam. his. | 0.068 (-0.222, 0.359)   | 0.644   | 0.042 (-0.192, 0.108)   | 0.582   | -0.303 (-0.798, 0.192) | 0.230   | 0.281 (0.044, 0.517)    | 0.020   |
| Constant  | -2.531 (-3.653, -1.409) | <0.001  | -2.777 (-3.424, -2.130) | <0.001  | -1.714 (-3.543, 0.115) | 0.066   | -2.178 (-2.983, -1.373) | <0.001  |

| Covariate | HF                      |         |
|-----------|-------------------------|---------|
|           | coeff. (95% CI)         | p value |
| ti1       | -0.186 (-0.319, -0.054) | 0.006   |
| ti2       | 0.227 (0.069, 0.386)    | 0.005   |
| Age       | -0.002 (-0.017, 0.014)  | 0.839   |
| SIMD sc.  | 0.001 (-0.007, 0.010)   | 0.757   |
| Fam. his. | 0.036 (-0.360, 0.432)   | 0.859   |
| Constant  | -1.881 (-3.219, -0.542) | 0.006   |

Note: 'Age' is age at first event; 'ti1' and 'ti2' are time spline function variables (see Tables A7-A10)

Table A6: Modelling mean costs pre- and post-first events

a) Men, pre-first event

| Covariate | non-fatal CHD       |         | non-fatal CBVD         |         | fatal CVD             |         | fatal non-CVD         |         |
|-----------|---------------------|---------|------------------------|---------|-----------------------|---------|-----------------------|---------|
|           | coeff. (95% CI)     | p value | coeff. (95% CI)        | p value | coeff. (95% CI)       | p value | coeff. (95% CI)       | p value |
| ti1       | 18.6 (-2.0, 39.2)   | 0.077   | 5.5 (-38.0, 49.0)      | 0.804   | 26.1 (-7.1, 59.3)     | 0.123   | 42.1 (-4.5, 88.7)     | 0.076   |
| ti2       | 115.0 (70.3, 159.8) | <0.001  | 156.6 (72.0, 241.2)    | <0.001  | 114.6 (56.8, 172.5)   | <0.001  | 237.2 (157.1, 317.4)  | <0.001  |
| Age       | 22.7 (16.4, 29.0)   | <0.001  | 17.3 (5.8, 28.9)       | 0.003   | 27.7 (16.5, 38.89)    | <0.001  | 24.7 (9.0, 40.5)      | 0.002   |
| SIMD sc.  | 5.2 (3.0, 7.4)      | <0.001  | 6.6 (2.9, 10.3)        | <0.001  | 3.8 (-0.1, 7.8)       | 0.059   | 4.7 (-0.5, 10.0)      | 0.078   |
| Fam. his. | 93.8 (1.5, 186.1)   | 0.046   | -161.9 (-328.5, 4.8)   | 0.057   | 67.4 (-120.9, 255.7)  | 0.483   | 116.9 (-198.7, 432.6) | 0.468   |
| Constant  | -1121 (-1446, -795) | <0.001  | -832.8 (-1483, -182.4) | 0.012   | -1345 (-1981, -709.2) | <0.001  | -1029 (-1890, -169.2) | 0.019   |

b) Women, pre-first event

| Covariate | non-fatal CHD         |         | non-fatal CBVD        |         | fatal CVD             |         | fatal non-CVD         |         |
|-----------|-----------------------|---------|-----------------------|---------|-----------------------|---------|-----------------------|---------|
|           | coeff. (95% CI)       | p value | coeff. (95% CI)       | p value | coeff. (95% CI)       | p value | coeff. (95% CI)       | p value |
| ti1       | -7.3 (-94.3, 79.8)    | 0.870   | 14.2 (-23.3, 51.6)    | 0.458   | 23.9 (-18.4, 66.2)    | 0.269   | 59.0 (11.5, 106.4)    | 0.015   |
| ti2       | 172.2 (-64.6, 408.9)  | 0.154   | 121.8 (57.7, 185.8)   | <0.001  | 144.7 (72.2, 217.3)   | <0.001  | 202.6 (125.8, 279.4)  | <0.001  |
| Age       | 0.5 (-25.1, 26.2)     | 0.967   | 26.3 (15.0, 37.6)     | <0.001  | 33.7 (18.4, 49.0)     | <0.001  | 16.0 (-3.5, 35.4)     | 0.107   |
| SIMD sc.  | 10.6 (2.3, 19.0)      | 0.013   | 8.4 (2.4, 14.4)       | 0.006   | 5.5 (0.8, 10.2)       | 0.022   | 11.9 (5.6, 18.3)      | <0.001  |
| Fam. his. | 337.8 (-235.7, 911.4) | 0.248   | 22.7 (-176.6, 222.0)  | 0.823   | 105.5 (-125.0, 336.0) | 0.370   | 47.7 (-229.7, 325.2)  | 0.736   |
| Constant  | -214.2 (-1359, 930.8) | 0.714   | -1462 (-2123, -800.5) | <0.001  | -1727 (-2643, -809.9) | <0.001  | -832.0 (-1894, 230.1) | 0.125   |

Note: 'Age' is age at survey; 'ti1' and 'ti2' are time spline function variables (see Tables A11-A12)

c) Men, after non-fatal CHD event

| Covariate      | coeff. (95% CI)         | p value |
|----------------|-------------------------|---------|
| ti1            | -552.6 (-638.7, -466.6) | <0.001  |
| ti2            | 654.9 (554.5, 755.3)    | <0.001  |
| Age at event   | 84.6 (66.9, 102.4)      | <0.001  |
| SIMD score     | 14.2 (7.6, 20.8)        | <0.001  |
| Family history | 239.8 (-80.4, 560.0)    | 0.142   |
| Constant       | -1024 (-2107, 59.0)     | <0.001  |

d) Men, after non-fatal CBVD event

| Covariate      | coeff. (95% CI)         | p value |
|----------------|-------------------------|---------|
| ti1            | -680.0 (-854.7, -505.2) | <0.001  |
| ti2            | 787.7 (555.7, 1020)     | <0.001  |
| Age at event   | 112.6 (81.2, 144.0)     | <0.001  |
| SIMD score     | 6.8 (-4.5, 18.1)        | 0.236   |
| Family history | -102.2 (-717.2, 512.9)  | 0.745   |
| Constant       | -1836 (-4010, 338.3)    | 0.098   |

e) Women, after non-fatal CHD event

| Covariate      | coeff. (95% CI)         | p value |
|----------------|-------------------------|---------|
| ti1            | -548.6 (-652.4, -444.8) | <0.001  |
| ti2            | 745.4 (600.4, 890.3)    | <0.001  |
| Age at event   | 90.7 (68.5, 112.9)      | <0.001  |
| SIMD score     | 13.6 (6.0, 21.3)        | <0.001  |
| Family history | -227.9 (-596.5, 140.7)  | 0.226   |
| Constant       | -1321 (-2900, 257.1)    | <0.001  |

f) Women, after non-fatal CBVD event

| Covariate      | coeff. (95% CI)         | p value |
|----------------|-------------------------|---------|
| ti1            | -542.3 (-744.1, -340.4) | <0.001  |
| ti2            | 595.6 (357.4, 833.9)    | <0.001  |
| Age at event   | 97.1 (67.0, 127.2)      | <0.001  |
| SIMD score     | 7.7 (-4.7, 20.0)        | 0.223   |
| Family history | -93.9 (-656.1, 468.4)   | 0.743   |
| Constant       | -1251 (-3593, 1092)     | 0.295   |

Note: 'ti1' and 'ti2' are time spline function variables (see Tables A7-A10)

Table A7: Time spline variables for models in Tables A5a and A6c

| year | ti1 | ti2      | yea | year | ti1      | ti1 | ti2 | ti2 | year | ti1 | ti2      |
|------|-----|----------|-----|------|----------|-----|-----|-----|------|-----|----------|
| 1    | 1   | 0        | 35  | 35   | 32.30769 |     |     |     | 68   | 68  | 70.38461 |
| 2    | 2   | 0.005917 | 36  | 36   | 33.46154 |     |     |     | 69   | 69  | 71.53846 |
| 3    | 3   | 0.047337 | 37  | 37   | 34.61538 |     |     |     | 70   | 70  | 72.69231 |
| 4    | 4   | 0.159763 | 38  | 38   | 35.76923 |     |     |     | 71   | 71  | 73.84615 |
| 5    | 5   | 0.378698 | 39  | 39   | 36.92308 |     |     |     | 72   | 72  | 75       |
| 6    | 6   | 0.739645 | 40  | 40   | 38.07692 |     |     |     | 73   | 73  | 76.15385 |
| 7    | 7   | 1.268491 | 41  | 41   | 39.23077 |     |     |     | 74   | 74  | 77.30769 |
| 8    | 8   | 1.952663 | 42  | 42   | 40.38462 |     |     |     | 75   | 75  | 78.46154 |
| 9    | 9   | 2.76997  | 43  | 43   | 41.53846 |     |     |     | 76   | 76  | 79.61539 |
| 10   | 10  | 3.698225 | 44  | 44   | 42.69231 |     |     |     | 77   | 77  | 80.76923 |
| 11   | 11  | 4.715237 | 45  | 45   | 43.84615 |     |     |     | 78   | 78  | 81.92308 |
| 12   | 12  | 5.798817 | 46  | 46   | 45       |     |     |     | 79   | 79  | 83.07692 |
| 13   | 13  | 6.926775 | 47  | 47   | 46.15385 |     |     |     | 80   | 80  | 84.23077 |
| 14   | 14  | 8.076923 | 48  | 48   | 47.30769 |     |     |     | 81   | 81  | 85.38461 |
| 15   | 15  | 9.230769 | 49  | 49   | 48.46154 |     |     |     | 82   | 82  | 86.53846 |
| 16   | 16  | 10.38461 | 50  | 50   | 49.61538 |     |     |     | 83   | 83  | 87.69231 |
| 17   | 17  | 11.53846 | 51  | 51   | 50.76923 |     |     |     | 84   | 84  | 88.84615 |
| 18   | 18  | 12.69231 | 52  | 52   | 51.92308 |     |     |     | 85   | 85  | 90       |
| 19   | 19  | 13.84615 | 53  | 53   | 53.07692 |     |     |     | 86   | 86  | 91.15385 |
| 20   | 20  | 15       | 54  | 54   | 54.23077 |     |     |     | 87   | 87  | 92.30769 |
| 21   | 21  | 16.15385 | 55  | 55   | 55.38462 |     |     |     | 88   | 88  | 93.46154 |
| 22   | 22  | 17.30769 | 56  | 56   | 56.53846 |     |     |     | 89   | 89  | 94.61539 |
| 23   | 23  | 18.46154 | 57  | 57   | 57.69231 |     |     |     | 90   | 90  | 95.76923 |
| 24   | 24  | 19.61539 | 58  | 58   | 58.84615 |     |     |     | 91   | 91  | 96.92308 |
| 25   | 25  | 20.76923 | 59  | 59   | 60       |     |     |     | 92   | 92  | 98.07692 |
| 26   | 26  | 21.92308 | 60  | 60   | 61.15385 |     |     |     | 93   | 93  | 99.23077 |
| 27   | 27  | 23.07692 | 61  | 61   | 62.30769 |     |     |     | 94   | 94  | 100.3846 |
| 28   | 28  | 24.23077 | 62  | 62   | 63.46154 |     |     |     | 95   | 95  | 101.5385 |
| 29   | 29  | 25.38461 | 63  | 63   | 64.61539 |     |     |     | 96   | 96  | 102.6923 |
| 30   | 30  | 26.53846 | 64  | 64   | 65.76923 |     |     |     | 97   | 97  | 103.8462 |
| 31   | 31  | 27.69231 | 65  | 65   | 66.92308 |     |     |     | 98   | 98  | 105      |
| 32   | 32  | 28.84615 | 66  | 66   | 68.07692 |     |     |     | 99   | 99  | 106.1538 |
| 33   | 33  | 30       | 67  | 67   | 69.23077 |     |     |     | 100  | 100 | 107.3077 |
| 34   | 34  | 31.15385 |     |      |          |     |     |     |      |     |          |

Table A8: Time spline variables for models in Tables A5b and A6d

| year | ti1 | ti2      | year | ti1 | ti2      | year | ti1 | ti2      |
|------|-----|----------|------|-----|----------|------|-----|----------|
| 1    | 1   | 0        | 35   | 35  | 31.63636 | 68   | 68  | 67.63636 |
| 2    | 2   | 0.008265 | 36   | 36  | 32.72727 | 69   | 69  | 68.72727 |
| 3    | 3   | 0.066116 | 37   | 37  | 33.81818 | 70   | 70  | 69.81818 |
| 4    | 4   | 0.223141 | 38   | 38  | 34.90909 | 71   | 71  | 70.90909 |
| 5    | 5   | 0.528926 | 39   | 39  | 36       | 72   | 72  | 72       |
| 6    | 6   | 1.020071 | 40   | 40  | 37.09091 | 73   | 73  | 73.09091 |
| 7    | 7   | 1.681228 | 41   | 41  | 38.18182 | 74   | 74  | 74.18182 |
| 8    | 8   | 2.484061 | 42   | 42  | 39.27273 | 75   | 75  | 75.27273 |
| 9    | 9   | 3.400236 | 43   | 43  | 40.36364 | 76   | 76  | 76.36364 |
| 10   | 10  | 4.401417 | 44   | 44  | 41.45454 | 77   | 77  | 77.45454 |
| 11   | 11  | 5.459268 | 45   | 45  | 42.54546 | 78   | 78  | 78.54546 |
| 12   | 12  | 6.545455 | 46   | 46  | 43.63636 | 79   | 79  | 79.63636 |
| 13   | 13  | 7.636364 | 47   | 47  | 44.72727 | 80   | 80  | 80.72727 |
| 14   | 14  | 8.727273 | 48   | 48  | 45.81818 | 81   | 81  | 81.81818 |
| 15   | 15  | 9.818182 | 49   | 49  | 46.90909 | 82   | 82  | 82.90909 |
| 16   | 16  | 10.90909 | 50   | 50  | 48       | 83   | 83  | 84       |
| 17   | 17  | 12       | 51   | 51  | 49.09091 | 84   | 84  | 85.09091 |
| 18   | 18  | 13.09091 | 52   | 52  | 50.18182 | 85   | 85  | 86.18182 |
| 19   | 19  | 14.18182 | 53   | 53  | 51.27273 | 86   | 86  | 87.27273 |
| 20   | 20  | 15.27273 | 54   | 54  | 52.36364 | 87   | 87  | 88.36364 |
| 21   | 21  | 16.36364 | 55   | 55  | 53.45454 | 88   | 88  | 89.45454 |
| 22   | 22  | 17.45455 | 56   | 56  | 54.54546 | 89   | 89  | 90.54546 |
| 23   | 23  | 18.54545 | 57   | 57  | 55.63636 | 90   | 90  | 91.63636 |
| 24   | 24  | 19.63636 | 58   | 58  | 56.72727 | 91   | 91  | 92.72727 |
| 25   | 25  | 20.72727 | 59   | 59  | 57.81818 | 92   | 92  | 93.81818 |
| 26   | 26  | 21.81818 | 60   | 60  | 58.90909 | 93   | 93  | 94.90909 |
| 27   | 27  | 22.90909 | 61   | 61  | 60       | 94   | 94  | 96       |
| 28   | 28  | 24       | 62   | 62  | 61.09091 | 95   | 95  | 97.09091 |
| 29   | 29  | 25.09091 | 63   | 63  | 62.18182 | 96   | 96  | 98.18182 |
| 30   | 30  | 26.18182 | 64   | 64  | 63.27273 | 97   | 97  | 99.27273 |
| 31   | 31  | 27.27273 | 65   | 65  | 64.36364 | 98   | 98  | 100.3636 |
| 32   | 32  | 28.36364 | 66   | 66  | 65.45454 | 99   | 99  | 101.4545 |
| 33   | 33  | 29.45455 | 67   | 67  | 66.54546 | 100  | 100 | 102.5455 |
| 34   | 34  | 30.54545 |      |     |          |      |     |          |



Table A9: Time spline variables for models in Tables A5c and A6e

| year | ti1 | ti2      | year | ti1 | ti2      | year | ti1 | ti2      |
|------|-----|----------|------|-----|----------|------|-----|----------|
| 1    | 1   | 0        | 35   | 35  | 26.15385 | 68   | 68  | 56.61538 |
| 2    | 2   | 0.005917 | 36   | 36  | 27.07692 | 69   | 69  | 57.53846 |
| 3    | 3   | 0.047337 | 37   | 37  | 28       | 70   | 70  | 58.46154 |
| 4    | 4   | 0.159763 | 38   | 38  | 28.92308 | 71   | 71  | 59.38462 |
| 5    | 5   | 0.378698 | 39   | 39  | 29.84615 | 72   | 72  | 60.30769 |
| 6    | 6   | 0.731098 | 40   | 40  | 30.76923 | 73   | 73  | 61.23077 |
| 7    | 7   | 1.20973  | 41   | 41  | 31.69231 | 74   | 74  | 62.15385 |
| 8    | 8   | 1.798817 | 42   | 42  | 32.61538 | 75   | 75  | 63.07692 |
| 9    | 9   | 2.482577 | 43   | 43  | 33.53846 | 76   | 76  | 64       |
| 10   | 10  | 3.245233 | 44   | 44  | 34.46154 | 77   | 77  | 64.92308 |
| 11   | 11  | 4.071006 | 45   | 45  | 35.38462 | 78   | 78  | 65.84615 |
| 12   | 12  | 4.944116 | 46   | 46  | 36.30769 | 79   | 79  | 66.76923 |
| 13   | 13  | 5.848783 | 47   | 47  | 37.23077 | 80   | 80  | 67.69231 |
| 14   | 14  | 6.769231 | 48   | 48  | 38.15385 | 81   | 81  | 68.61539 |
| 15   | 15  | 7.692307 | 49   | 49  | 39.07692 | 82   | 82  | 69.53846 |
| 16   | 16  | 8.615385 | 50   | 50  | 40       | 83   | 83  | 70.46154 |
| 17   | 17  | 9.538462 | 51   | 51  | 40.92308 | 84   | 84  | 71.38461 |
| 18   | 18  | 10.46154 | 52   | 52  | 41.84615 | 85   | 85  | 72.30769 |
| 19   | 19  | 11.38461 | 53   | 53  | 42.76923 | 86   | 86  | 73.23077 |
| 20   | 20  | 12.30769 | 54   | 54  | 43.69231 | 87   | 87  | 74.15385 |
| 21   | 21  | 13.23077 | 55   | 55  | 44.61538 | 88   | 88  | 75.07692 |
| 22   | 22  | 14.15385 | 56   | 56  | 45.53846 | 89   | 89  | 76       |
| 23   | 23  | 15.07692 | 57   | 57  | 46.46154 | 90   | 90  | 76.92308 |
| 24   | 24  | 16       | 58   | 58  | 47.38462 | 91   | 91  | 77.84615 |
| 25   | 25  | 16.92308 | 59   | 59  | 48.30769 | 92   | 92  | 78.76923 |
| 26   | 26  | 17.84615 | 60   | 60  | 49.23077 | 93   | 93  | 79.69231 |
| 27   | 27  | 18.76923 | 61   | 61  | 50.15385 | 94   | 94  | 80.61539 |
| 28   | 28  | 19.69231 | 62   | 62  | 51.07692 | 95   | 95  | 81.53846 |
| 29   | 29  | 20.61539 | 63   | 63  | 52       | 96   | 96  | 82.46154 |
| 30   | 30  | 21.53846 | 64   | 64  | 52.92308 | 97   | 97  | 83.38461 |
| 31   | 31  | 22.46154 | 65   | 65  | 53.84615 | 98   | 98  | 84.30769 |
| 32   | 32  | 23.38461 | 66   | 66  | 54.76923 | 99   | 99  | 85.23077 |
| 33   | 33  | 24.30769 | 67   | 67  | 55.69231 | 100  | 100 | 86.15385 |
| 34   | 34  | 25.23077 |      |     |          |      |     |          |

Table A10: Time spline variables for models in Tables A5d and A6f

| year | ti1 | ti2      | year | ti1 | ti2      | year | ti1 | ti2      |
|------|-----|----------|------|-----|----------|------|-----|----------|
| 1    | 1   | 0        | 35   | 35  | 31.63636 | 68   | 68  | 67.63636 |
| 2    | 2   | 0.008265 | 36   | 36  | 32.72727 | 69   | 69  | 68.72727 |
| 3    | 3   | 0.066116 | 37   | 37  | 33.81818 | 70   | 70  | 69.81818 |
| 4    | 4   | 0.223141 | 38   | 38  | 34.90909 | 71   | 71  | 70.90909 |
| 5    | 5   | 0.528926 | 39   | 39  | 36       | 72   | 72  | 72       |
| 6    | 6   | 1.020071 | 40   | 40  | 37.09091 | 73   | 73  | 73.09091 |
| 7    | 7   | 1.681228 | 41   | 41  | 38.18182 | 74   | 74  | 74.18182 |
| 8    | 8   | 2.484061 | 42   | 42  | 39.27273 | 75   | 75  | 75.27273 |
| 9    | 9   | 3.400236 | 43   | 43  | 40.36364 | 76   | 76  | 76.36364 |
| 10   | 10  | 4.401417 | 44   | 44  | 41.45454 | 77   | 77  | 77.45454 |
| 11   | 11  | 5.459268 | 45   | 45  | 42.54546 | 78   | 78  | 78.54546 |
| 12   | 12  | 6.545455 | 46   | 46  | 43.63636 | 79   | 79  | 79.63636 |
| 13   | 13  | 7.636364 | 47   | 47  | 44.72727 | 80   | 80  | 80.72727 |
| 14   | 14  | 8.727273 | 48   | 48  | 45.81818 | 81   | 81  | 81.81818 |
| 15   | 15  | 9.818182 | 49   | 49  | 46.90909 | 82   | 82  | 82.90909 |
| 16   | 16  | 10.90909 | 50   | 50  | 48       | 83   | 83  | 84       |
| 17   | 17  | 12       | 51   | 51  | 49.09091 | 84   | 84  | 85.09091 |
| 18   | 18  | 13.09091 | 52   | 52  | 50.18182 | 85   | 85  | 86.18182 |
| 19   | 19  | 14.18182 | 53   | 53  | 51.27273 | 86   | 86  | 87.27273 |
| 20   | 20  | 15.27273 | 54   | 54  | 52.36364 | 87   | 87  | 88.36364 |
| 21   | 21  | 16.36364 | 55   | 55  | 53.45454 | 88   | 88  | 89.45454 |
| 22   | 22  | 17.45455 | 56   | 56  | 54.54546 | 89   | 89  | 90.54546 |
| 23   | 23  | 18.54545 | 57   | 57  | 55.63636 | 90   | 90  | 91.63636 |
| 24   | 24  | 19.63636 | 58   | 58  | 56.72727 | 91   | 91  | 92.72727 |
| 25   | 25  | 20.72727 | 59   | 59  | 57.81818 | 92   | 92  | 93.81818 |
| 26   | 26  | 21.81818 | 60   | 60  | 58.90909 | 93   | 93  | 94.90909 |
| 27   | 27  | 22.90909 | 61   | 61  | 60       | 94   | 94  | 96       |
| 28   | 28  | 24       | 62   | 62  | 61.09091 | 95   | 95  | 97.09091 |
| 29   | 29  | 25.09091 | 63   | 63  | 62.18182 | 96   | 96  | 98.18182 |
| 30   | 30  | 26.18182 | 64   | 64  | 63.27273 | 97   | 97  | 99.27273 |
| 31   | 31  | 27.27273 | 65   | 65  | 64.36364 | 98   | 98  | 100.3636 |
| 32   | 32  | 28.36364 | 66   | 66  | 65.45454 | 99   | 99  | 101.4545 |
| 33   | 33  | 29.45455 | 67   | 67  | 66.54546 | 100  | 100 | 102.5455 |
| 34   | 34  | 30.54545 |      |     |          |      |     |          |

Table A11: Time spline variables for models in Table A6a (non-fatal CHD)

| year | ti1 | ti2      | year | ti1 | ti2      | year | ti1 | ti2      |
|------|-----|----------|------|-----|----------|------|-----|----------|
| 1    | 1   | 0        | 35   | 35  | 26.33333 | 68   | 68  | 59.33333 |
| 2    | 2   | 0        | 36   | 36  | 27.33333 | 69   | 69  | 60.33333 |
| 3    | 3   | 0.004444 | 37   | 37  | 28.33333 | 70   | 70  | 61.33333 |
| 4    | 4   | 0.035556 | 38   | 38  | 29.33333 | 71   | 71  | 62.33333 |
| 5    | 5   | 0.12     | 39   | 39  | 30.33333 | 72   | 72  | 63.33333 |
| 6    | 6   | 0.284445 | 40   | 40  | 31.33333 | 73   | 73  | 64.33334 |
| 7    | 7   | 0.555556 | 41   | 41  | 32.33333 | 74   | 74  | 65.33334 |
| 8    | 8   | 0.953333 | 42   | 42  | 33.33333 | 75   | 75  | 66.33334 |
| 9    | 9   | 1.471111 | 43   | 43  | 34.33333 | 76   | 76  | 67.33334 |
| 10   | 10  | 2.095556 | 44   | 44  | 35.33333 | 77   | 77  | 68.33334 |
| 11   | 11  | 2.813333 | 45   | 45  | 36.33333 | 78   | 78  | 69.33334 |
| 12   | 12  | 3.611111 | 46   | 46  | 37.33333 | 79   | 79  | 70.33334 |
| 13   | 13  | 4.475555 | 47   | 47  | 38.33333 | 80   | 80  | 71.33334 |
| 14   | 14  | 5.393333 | 48   | 48  | 39.33333 | 81   | 81  | 72.33334 |
| 15   | 15  | 6.351111 | 49   | 49  | 40.33333 | 82   | 82  | 73.33334 |
| 16   | 16  | 7.335556 | 50   | 50  | 41.33333 | 83   | 83  | 74.33334 |
| 17   | 17  | 8.333333 | 51   | 51  | 42.33333 | 84   | 84  | 75.33334 |
| 18   | 18  | 9.333333 | 52   | 52  | 43.33333 | 85   | 85  | 76.33334 |
| 19   | 19  | 10.33333 | 53   | 53  | 44.33333 | 86   | 86  | 77.33334 |
| 20   | 20  | 11.33333 | 54   | 54  | 45.33333 | 87   | 87  | 78.33334 |
| 21   | 21  | 12.33333 | 55   | 55  | 46.33333 | 88   | 88  | 79.33334 |
| 22   | 22  | 13.33333 | 56   | 56  | 47.33333 | 89   | 89  | 80.33334 |
| 23   | 23  | 14.33333 | 57   | 57  | 48.33333 | 90   | 90  | 81.33334 |
| 24   | 24  | 15.33333 | 58   | 58  | 49.33333 | 91   | 91  | 82.33334 |
| 25   | 25  | 16.33333 | 59   | 59  | 50.33333 | 92   | 92  | 83.33334 |
| 26   | 26  | 17.33333 | 60   | 60  | 51.33333 | 93   | 93  | 84.33334 |
| 27   | 27  | 18.33333 | 61   | 61  | 52.33333 | 94   | 94  | 85.33334 |
| 28   | 28  | 19.33333 | 62   | 62  | 53.33333 | 95   | 95  | 86.33334 |
| 29   | 29  | 20.33333 | 63   | 63  | 54.33333 | 96   | 96  | 87.33334 |
| 30   | 30  | 21.33333 | 64   | 64  | 55.33333 | 97   | 97  | 88.33334 |
| 31   | 31  | 22.33333 | 65   | 65  | 56.33333 | 98   | 98  | 89.33334 |
| 32   | 32  | 23.33333 | 66   | 66  | 57.33333 | 99   | 99  | 90.33334 |
| 33   | 33  | 24.33333 | 67   | 67  | 58.33333 | 100  | 100 | 91.33334 |
| 34   | 34  | 25.33333 |      |     |          |      |     |          |

Table A12: Time spline variables for models in Table A6a (non-fatal CBVD, fatal CVD, fatal non-CVD) and A6b

| <b>year</b> | <b>ti1</b> | <b>ti2</b> | <b>year</b> | <b>ti1</b> | <b>ti2</b> | <b>year</b> | <b>ti1</b> | <b>ti2</b> |
|-------------|------------|------------|-------------|------------|------------|-------------|------------|------------|
| 1           | 1          | 0          | 35          | 35         | 31.2       | 68          | 68         | 70.8       |
| 2           | 2          | 0          | 36          | 36         | 32.4       | 69          | 69         | 72         |
| 3           | 3          | 0.004444   | 37          | 37         | 33.6       | 70          | 70         | 73.2       |
| 4           | 4          | 0.035556   | 38          | 38         | 34.8       | 71          | 71         | 74.4       |
| 5           | 5          | 0.12       | 39          | 39         | 36         | 72          | 72         | 75.6       |
| 6           | 6          | 0.284445   | 40          | 40         | 37.2       | 73          | 73         | 76.8       |
| 7           | 7          | 0.555556   | 41          | 41         | 38.4       | 74          | 74         | 78         |
| 8           | 8          | 0.96       | 42          | 42         | 39.6       | 75          | 75         | 79.2       |
| 9           | 9          | 1.517037   | 43          | 43         | 40.8       | 76          | 76         | 80.4       |
| 10          | 10         | 2.216296   | 44          | 44         | 42         | 77          | 77         | 81.6       |
| 11          | 11         | 3.04       | 45          | 45         | 43.2       | 78          | 78         | 82.8       |
| 12          | 12         | 3.97037    | 46          | 46         | 44.4       | 79          | 79         | 84         |
| 13          | 13         | 4.98963    | 47          | 47         | 45.6       | 80          | 80         | 85.2       |
| 14          | 14         | 6.08       | 48          | 48         | 46.8       | 81          | 81         | 86.4       |
| 15          | 15         | 7.223704   | 49          | 49         | 48         | 82          | 82         | 87.6       |
| 16          | 16         | 8.402963   | 50          | 50         | 49.2       | 83          | 83         | 88.8       |
| 17          | 17         | 9.6        | 51          | 51         | 50.4       | 84          | 84         | 90         |
| 18          | 18         | 10.8       | 52          | 52         | 51.6       | 85          | 85         | 91.2       |
| 19          | 19         | 12         | 53          | 53         | 52.8       | 86          | 86         | 92.4       |
| 20          | 20         | 13.2       | 54          | 54         | 54         | 87          | 87         | 93.6       |
| 21          | 21         | 14.4       | 55          | 55         | 55.2       | 88          | 88         | 94.8       |
| 22          | 22         | 15.6       | 56          | 56         | 56.4       | 89          | 89         | 96         |
| 23          | 23         | 16.8       | 57          | 57         | 57.6       | 90          | 90         | 97.2       |
| 24          | 24         | 18         | 58          | 58         | 58.8       | 91          | 91         | 98.4       |
| 25          | 25         | 19.2       | 59          | 59         | 60         | 92          | 92         | 99.6       |
| 26          | 26         | 20.4       | 60          | 60         | 61.2       | 93          | 93         | 100.8      |
| 27          | 27         | 21.6       | 61          | 61         | 62.4       | 94          | 94         | 102        |
| 28          | 28         | 22.8       | 62          | 62         | 63.6       | 95          | 95         | 103.2      |
| 29          | 29         | 24         | 63          | 63         | 64.8       | 96          | 96         | 104.4      |
| 30          | 30         | 25.2       | 64          | 64         | 66         | 97          | 97         | 105.6      |
| 31          | 31         | 26.4       | 65          | 65         | 67.2       | 98          | 98         | 106.8      |
| 32          | 32         | 27.6       | 66          | 66         | 68.4       | 99          | 99         | 108        |
| 33          | 33         | 28.8       | 67          | 67         | 69.6       | 100         | 100        | 109.2      |
| 34          | 34         | 30         |             |            |            |             |            |            |



Table A13: Cholesky decomposition matrix for model in Table A1a (non-fatal CHD)

|           | Age       | SIMD sc.  | Diabetes  | Fam. his. | CPD       | SBP       | TC       | HDL      | Constant | Gamma    |
|-----------|-----------|-----------|-----------|-----------|-----------|-----------|----------|----------|----------|----------|
| Age       | 1.26E-05  |           |           |           |           |           |          |          |          |          |
| SIMD sc.  | -5.63E-08 | 1.67E-06  |           |           |           |           |          |          |          |          |
| Diabetes  | -1.9E-05  | -9.68E-06 | 0.03375   |           |           |           |          |          |          |          |
| Fam. his. | 1.32E-05  | -1.65E-06 | 0.000132  | 0.003352  |           |           |          |          |          |          |
| CPD       | 8.88E-07  | -4.29E-07 | 2.49E-05  | -7.14E-07 | 4.76E-06  |           |          |          |          |          |
| SBP       | -1.36E-06 | -8.92E-08 | -9.51E-06 | -2.38E-06 | 5.41E-08  | 1.97E-06  |          |          |          |          |
| TC        | -1.82E-06 | 2.97E-06  | -0.00025  | -6.5E-05  | -1.65E-06 | -3.02E-06 | 0.000577 |          |          |          |
| HDL       | -1.9E-05  | 4.02E-06  | 0.000214  | 8.21E-06  | 1.71E-05  | -2.24E-06 | -0.00022 | 0.008855 |          |          |
| Constant  | -0.00045  | -5.9E-05  | 0.002371  | -0.00105  | -0.0001   | -0.00018  | -0.00306 | -0.0087  | 0.086123 |          |
| Gamma     | 1.54E-06  | 6.02E-07  | 4.04E-05  | 4.01E-06  | 5.24E-07  | 2.54E-07  | 2.35E-06 | -2.1E-05 | -0.00034 | 1.76E-05 |

Table A14: Cholesky decomposition matrix for model in Table A1a (non-fatal CBVD)

|           | Age       | SIMD sc.  | Diabetes | Fam. his. | CPD       | SBP       | TC       | HDL      | Constant | Gamma    |
|-----------|-----------|-----------|----------|-----------|-----------|-----------|----------|----------|----------|----------|
| Age       | 3.79E-05  |           |          |           |           |           |          |          |          |          |
| SIMD sc.  | -1.01E-06 | 4.46E-06  |          |           |           |           |          |          |          |          |
| Diabetes  | -5.6E-05  | -3.3E-05  | 0.065828 |           |           |           |          |          |          |          |
| Fam. his. | 3.75E-05  | -4.72E-06 | 0.000427 | 0.011873  |           |           |          |          |          |          |
| CPD       | 3.28E-06  | -1.23E-06 | 7.57E-05 | -7.44E-06 | 1.32E-05  |           |          |          |          |          |
| SBP       | -3.95E-06 | -3.16E-07 | -1E-05   | -1.2E-05  | 5.24E-08  | 4.98E-06  |          |          |          |          |
| TC        | -7.37E-06 | 9.44E-06  | -0.00024 | -0.00017  | -1.20E-07 | -7.77E-06 | 0.001865 |          |          |          |
| HDL       | -3E-05    | 3.05E-06  | 0.002974 | -0.00029  | 2.43E-05  | -1.8E-05  | -0.00071 | 0.018683 |          |          |
| Constant  | -0.00143  | -0.00011  | -0.002   | -0.00161  | -0.00033  | -0.00041  | -0.00964 | -0.01667 | 0.241253 |          |
| Gamma     | 5.86E-06  | 1.87E-06  | 0.000121 | 6.77E-06  | 1.76E-06  | 7.97E-07  | 3.09E-06 | -3.7E-05 | -0.00118 | 5.37E-05 |

Table A15: Cholesky decomposition matrix for model in Table A1a (fatal CVD)

|           | Age       | SIMD sc.  | Diabetes  | Fam. his. | CPD       | SBP       | TC       | HDL      | Constant | Gamma    |
|-----------|-----------|-----------|-----------|-----------|-----------|-----------|----------|----------|----------|----------|
| Age       | 2.84E-05  |           |           |           |           |           |          |          |          |          |
| SIMD sc.  | -1.41E-06 | 3.04E-06  |           |           |           |           |          |          |          |          |
| Diabetes  | -2.9E-05  | -2.2E-05  | 0.057734  |           |           |           |          |          |          |          |
| Fam. his. | 2.89E-05  | -4.29E-06 | 0.000287  | 0.007269  |           |           |          |          |          |          |
| CPD       | 2.89E-06  | -8.25E-07 | 3.37E-05  | -7.79E-06 | 8.31E-06  |           |          |          |          |          |
| SBP       | -2.68E-06 | -2.19E-07 | -3.69E-06 | -1E-05    | -1.17E-07 | 2.82E-06  |          |          |          |          |
| TC        | 3.20E-06  | 6.64E-06  | -0.00037  | -7.8E-05  | 4.02E-06  | -3.16E-06 | 0.001252 |          |          |          |
| HDL       | -3E-05    | -1.52E-07 | -0.00018  | -0.00031  | 7.41E-06  | -2.5E-05  | -0.0006  | 0.013304 |          |          |
| Constant  | -0.00119  | -3.2E-05  | 0.001989  | -0.00097  | -0.00026  | -0.0002   | -0.00717 | -0.00859 | 0.165284 |          |
| Gamma     | 4.71E-06  | 1.12E-06  | 0.0001    | 1.81E-06  | 1.27E-06  | 4.50E-07  | 4.01E-06 | -4E-05   | -0.00078 | 3.56E-05 |

Table A16: Cholesky decomposition matrix for model in Table A1a (fatal non-CVD)

|           | Age       | SIMD sc.  | Diabetes  | Fam. his. | CPD      | SBP       | TC       | HDL      | Constant | Gamma    |
|-----------|-----------|-----------|-----------|-----------|----------|-----------|----------|----------|----------|----------|
| Age       | 1.83E-05  |           |           |           |          |           |          |          |          |          |
| SIMD sc.  | -7.87E-07 | 2.10E-06  |           |           |          |           |          |          |          |          |
| Diabetes  | -1.7E-05  | -1.3E-05  | 0.06594   |           |          |           |          |          |          |          |
| Fam. his. | 1.73E-05  | -2.54E-06 | 0.000451  | 0.005661  |          |           |          |          |          |          |
| CPD       | 1.72E-06  | -5.79E-07 | 3.27E-05  | -3.54E-06 | 5.78E-06 |           |          |          |          |          |
| SBP       | -1.63E-06 | -1.57E-07 | -4.59E-06 | -5.03E-06 | 7.55E-08 | 2.71E-06  |          |          |          |          |
| TC        | -2.47E-06 | 4.63E-06  | -0.00014  | -8E-05    | 1.39E-06 | -4.19E-06 | 0.000922 |          |          |          |
| HDL       | -1.6E-05  | 1.42E-06  | 0.001089  | -1.2E-05  | 8.01E-06 | -9.23E-06 | -0.00024 | 0.007462 |          |          |
| Constant  | -0.00076  | -3.8E-05  | -0.00081  | -0.00098  | -0.00018 | -0.00024  | -0.00479 | -0.00697 | 0.123588 |          |
| Gamma     | 3.27E-06  | 8.97E-07  | 3.96E-05  | 1.28E-06  | 8.05E-07 | 3.28E-07  | 2.69E-07 | -1.2E-05 | -0.00056 | 2.51E-05 |

Table A17: Cholesky decomposition matrix for model in Table A1b (non-fatal CHD)

|           | Age       | SIMD sc.  | Diabetes  | Fam. his. | CPD      | SBP       | TC        | HDL      | Constant | Gamma    |
|-----------|-----------|-----------|-----------|-----------|----------|-----------|-----------|----------|----------|----------|
| Age       | 2.18E-05  |           |           |           |          |           |           |          |          |          |
| SIMD sc.  | -7.96E-07 | 2.26E-06  |           |           |          |           |           |          |          |          |
| Diabetes  | -2.9E-05  | -9.53E-06 | 0.037997  |           |          |           |           |          |          |          |
| Fam. his. | 0.000018  | -2.08E-06 | 8.26E-05  | 0.004177  |          |           |           |          |          |          |
| CPD       | 2.66E-06  | -8.93E-07 | 2.72E-05  | -1.58E-06 | 9.93E-06 |           |           |          |          |          |
| SBP       | -2.46E-06 | -1.20E-07 | -2.51E-06 | -4.40E-06 | 2.39E-07 | 2.50E-06  |           |          |          |          |
| TC        | -3.7E-05  | 5.10E-06  | -0.00027  | -0.00013  | -1.2E-05 | -3.42E-06 | 0.000695  |          |          |          |
| HDL       | -3.7E-05  | 3E-05     | 0.00214   | -4E-05    | 3.5E-05  | 3.95E-06  | -0.00022  | 0.009329 |          |          |
| Constant  | -0.00054  | -9.9E-05  | -0.00115  | -0.00131  | -0.00021 | -0.00019  | -0.00201  | -0.01228 | 0.100345 |          |
| Gamma     | 2.87E-06  | 8.61E-07  | 3.61E-05  | 8.54E-06  | 7.60E-07 | 1.70E-07  | -2.70E-06 | -3.3E-05 | -0.00048 | 2.55E-05 |

Table A18: Cholesky decomposition matrix for model in Table A1b (non-fatal CBVD)

|           | Age       | SIMD sc.  | Diabetes | Fam. his. | CPD      | SBP      | TC       | HDL      | Constant | Gamma    |
|-----------|-----------|-----------|----------|-----------|----------|----------|----------|----------|----------|----------|
| Age       | 5.7E-05   |           |          |           |          |          |          |          |          |          |
| SIMD sc.  | -3.01E-06 | 5.43E-06  |          |           |          |          |          |          |          |          |
| Diabetes  | -8.7E-05  | -3E-05    | 0.066499 |           |          |          |          |          |          |          |
| Fam. his. | 5.36E-05  | -3.65E-06 | 0.000852 | 0.011053  |          |          |          |          |          |          |
| CPD       | 7.60E-06  | -2.08E-06 | 5.76E-05 | 2.80E-06  | 2.46E-05 |          |          |          |          |          |
| SBP       | -5.89E-06 | -3.39E-07 | -1.1E-05 | -4.99E-06 | 4.55E-07 | 5.78E-06 |          |          |          |          |
| TC        | -0.00012  | 1.56E-05  | -0.00029 | -0.00044  | -2.7E-05 | -1.4E-05 | 0.002499 |          |          |          |
| HDL       | -9.3E-05  | 6.54E-05  | 0.003344 | 0.00022   | 8.84E-05 | 3.79E-06 | -0.00045 | 0.021592 |          |          |
| Constant  | -0.00143  | -0.0002   | -0.00087 | -0.00427  | -0.00059 | -0.00041 | -0.00758 | -0.02873 | 0.264345 |          |
| Gamma     | 9.61E-06  | 2.25E-06  | 8.87E-05 | 2.39E-05  | 2.09E-06 | 4.86E-07 | -1.4E-05 | -7.9E-05 | -0.0014  | 6.83E-05 |



Table A19: Cholesky decomposition matrix for model in Table A1b (fatal CVD)

|           | Age       | SIMD sc.  | Diabetes  | Fam. his. | CPD      | SBP       | TC        | HDL      | Constant | Gamma    |
|-----------|-----------|-----------|-----------|-----------|----------|-----------|-----------|----------|----------|----------|
| Age       | 5.22E-05  |           |           |           |          |           |           |          |          |          |
| SIMD sc.  | -3.12E-06 | 4.91E-06  |           |           |          |           |           |          |          |          |
| Diabetes  | -6.5E-05  | -3E-05    | 0.056007  |           |          |           |           |          |          |          |
| Fam. his. | 4.58E-05  | -1.64E-06 | 0.000961  | 0.009241  |          |           |           |          |          |          |
| CPD       | 6.60E-06  | -1.85E-06 | 3.83E-05  | 9.60E-06  | 1.48E-05 |           |           |          |          |          |
| SBP       | -4.81E-06 | -1.95E-07 | -2.57E-06 | -4.48E-06 | 4.62E-07 | 4.30E-06  |           |          |          |          |
| TC        | -7.1E-05  | 1.13E-05  | -0.00014  | -0.00025  | -2E-05   | -5.45E-06 | 0.001614  |          |          |          |
| HDL       | -4.1E-05  | 4.73E-05  | 0.002741  | 0.000329  | 5.4E-05  | 3.09E-06  | -0.00069  | 0.015663 |          |          |
| Constant  | -0.00173  | -0.00012  | -0.00286  | -0.0045   | -0.00049 | -0.00032  | -0.00528  | -0.0204  | 0.241351 |          |
| Gamma     | 8.99E-06  | 1.83E-06  | 8.77E-05  | 2.29E-05  | 1.31E-06 | 4.95E-07  | -5.91E-06 | -5.4E-05 | -0.00128 | 5.58E-05 |

Table A20: Cholesky decomposition matrix for model in Table A1b (fatal non-CVD)

|           | Age       | SIMD sc.  | Diabetes  | Fam. his. | CPD      | SBP       | TC        | HDL      | Constant | Gamma    |
|-----------|-----------|-----------|-----------|-----------|----------|-----------|-----------|----------|----------|----------|
| Age       | 2.61E-05  |           |           |           |          |           |           |          |          |          |
| SIMD sc.  | -1.22E-06 | 2.61E-06  |           |           |          |           |           |          |          |          |
| Diabetes  | -5.4E-05  | -1.3E-05  | 0.103373  |           |          |           |           |          |          |          |
| Fam. his. | 1.88E-05  | -1.43E-06 | 0.000119  | 0.005609  |          |           |           |          |          |          |
| CPD       | 3.22E-06  | -1.10E-06 | 1.32E-05  | 2.35E-06  | 8.98E-06 |           |           |          |          |          |
| SBP       | -2.87E-06 | -1.45E-07 | -8.82E-06 | -3.44E-06 | 2.02E-07 | 3.01E-06  |           |          |          |          |
| TC        | -4.9E-05  | 5.38E-06  | 0.000137  | -0.00016  | -1.3E-05 | -4.92E-06 | 0.00103   |          |          |          |
| HDL       | -2.1E-05  | 2.4E-05   | 0.000733  | 0.000174  | 3.07E-05 | 7.74E-07  | -0.00041  | 0.008691 |          |          |
| Constant  | -0.0007   | -7.7E-05  | 0.000422  | -0.00161  | -0.00022 | -0.00022  | -0.00277  | -0.01125 | 0.118397 |          |
| Gamma     | 3.99E-06  | 1.10E-06  | 4.08E-05  | 8.37E-06  | 5.54E-07 | 1.90E-07  | -4.73E-06 | -2.5E-05 | -0.00062 | 3.03E-05 |

Table A21: Cholesky decomposition matrix for model in Table A2a

|                | Age at event | SIMD score | Family history | Constant | Gamma    |
|----------------|--------------|------------|----------------|----------|----------|
| Age at event   | 3.95E-05     |            |                |          |          |
| SIMD score     | 1.29E-06     | 4.53E-06   |                |          |          |
| Family history | 5.81E-05     | -1.1E-05   | 0.01014        |          |          |
| Constant       | -0.00275     | -0.00023   | -0.00676       | 0.202488 |          |
| Gamma          | 2.62E-05     | 2.19E-06   | 1.38E-05       | -0.00246 | 0.000116 |

Table A22: Cholesky decomposition matrix for model in Table A2b

|                | Age at event | SIMD score | Family history | Constant | Gamma    |
|----------------|--------------|------------|----------------|----------|----------|
| Age at event   | 9.59E-05     |            |                |          |          |
| SIMD score     | 2.70E-06     | 9.60E-06   |                |          |          |
| Family history | 0.000123     | 6.25E-07   | 0.027277       |          |          |
| Constant       | -0.00685     | -0.00052   | -0.01452       | 0.513441 |          |
| Gamma          | 7.25E-05     | 4.20E-06   | -7.7E-05       | -0.00675 | 0.000379 |

Table A23: Cholesky decomposition matrix for model in Table A2c

|                | Age at event | SIMD score | Family history | Constant | Gamma    |
|----------------|--------------|------------|----------------|----------|----------|
| Age at event   | 6.08E-05     |            |                |          |          |
| SIMD score     | 8.05E-07     | 6.06E-06   |                |          |          |
| Family history | 5.03E-05     | -4.91E-06  | 0.014259       |          |          |
| Constant       | -0.00437     | -0.00026   | -0.00863       | 0.3313   |          |
| Gamma          | 4.5E-05      | 4.42E-07   | -6.3E-05       | -0.00411 | 0.000197 |

Table A24: Cholesky decomposition matrix for model in Table A2d

|                | Age at event | SIMD score | Family history | Constant | Gamma    |
|----------------|--------------|------------|----------------|----------|----------|
| Age at event   | 0.000106     |            |                |          |          |
| SIMD score     | -2.60E-06    | 1.41E-05   |                |          |          |
| Family history | 0.000242     | -2.6E-05   | 0.028796       |          |          |
| Constant       | -0.00775     | -0.00031   | -0.02781       | 0.604536 |          |
| Gamma          | 9.8E-05      | 7.31E-07   | 6.96E-05       | -0.00917 | 0.000503 |

Table A25: Cholesky decomposition matrix for model in Table A5a (CHD)

|           | ti1       | ti2       | Age       | SIMD sc.  | Fam. his. | Constant |
|-----------|-----------|-----------|-----------|-----------|-----------|----------|
| ti1       | 0.000116  |           |           |           |           |          |
| ti2       | -0.00014  | 0.000182  |           |           |           |          |
| Age       | 6.22E-06  | -3.90E-06 | 8.74E-06  |           |           |          |
| SIMD sc.  | 1.35E-06  | -1.27E-06 | 7.33E-07  | 9.95E-07  |           |          |
| Fam. his. | -6.39E-06 | 9.07E-06  | -2.52E-07 | -4.01E-06 | 0.001949  |          |
| Constant  | -0.00085  | 0.000739  | -0.00059  | -7.7E-05  | -0.00052  | 0.043191 |

Table A26: Cholesky decomposition matrix for model in Table A5a (Stroke)

|           | ti1      | ti2       | Age      | SIMD sc.  | Fam. his. | Constant |
|-----------|----------|-----------|----------|-----------|-----------|----------|
| ti1       | 0.00055  |           |          |           |           |          |
| ti2       | -0.00071 | 0.00104   |          |           |           |          |
| Age       | 1.71E-05 | -1.2E-05  | 1.69E-05 |           |           |          |
| SIMD sc.  | 4.22E-06 | -5.92E-06 | 1.17E-07 | 2.90E-06  |           |          |
| Fam. his. | -0.00018 | 0.000272  | -3.8E-05 | -6.14E-06 | 0.006407  |          |
| Constant  | -0.00273 | 0.002691  | -0.00109 | -9.8E-05  | 0.000618  | 0.080138 |

Table A27: Cholesky decomposition matrix for model in Table A5a (Intermittent claudication)

|           | ti1      | ti2      | Age      | SIMD sc. | Fam. his. | Constant |
|-----------|----------|----------|----------|----------|-----------|----------|
| ti1       | 0.000791 |          |          |          |           |          |
| ti2       | -0.001   | 0.001377 |          |          |           |          |
| Age       | 1.76E-05 | -1.5E-05 | 3.32E-05 |          |           |          |
| SIMD sc.  | -1E-05   | 1.48E-05 | 8.78E-07 | 5.65E-06 |           |          |
| Fam. his. | 0.000179 | -5.8E-05 | 7.24E-06 | 4.25E-05 | 0.011861  |          |
| Constant  | -0.00315 | 0.003197 | -0.00213 | -0.00022 | -0.00647  | 0.152848 |

Table A28: Cholesky decomposition matrix for model in Table A5a (Other heart condition)

|           | ti1       | ti2      | Age      | SIMD sc.  | Fam. his. | Constant |
|-----------|-----------|----------|----------|-----------|-----------|----------|
| ti1       | 0.000255  |          |          |           |           |          |
| ti2       | -0.00032  | 0.000457 |          |           |           |          |
| Age       | 1.94E-06  | 6.99E-06 | 1.42E-05 |           |           |          |
| SIMD sc.  | -9.29E-07 | 5.15E-07 | 2.97E-07 | 1.73E-06  |           |          |
| Fam. his. | -2.8E-05  | 6.41E-05 | 2.23E-06 | -5.36E-06 | 0.003964  |          |
| Constant  | -0.00093  | 0.000466 | -0.00091 | -6E-05    | -0.00128  | 0.063427 |

Table A29: Cholesky decomposition matrix for model in Table A5a (Heart failure)

|           | ti1       | ti2      | Age      | SIMD sc. | Fam. his. | Constant |
|-----------|-----------|----------|----------|----------|-----------|----------|
| ti1       | 0.000474  |          |          |          |           |          |
| ti2       | -0.00065  | 0.001032 |          |          |           |          |
| Age       | 3.61E-06  | 9.15E-06 | 2.24E-05 |          |           |          |
| SIMD sc.  | -4.88E-06 | 5.68E-06 | 1.18E-06 | 3.65E-06 |           |          |
| Fam. his. | -0.00037  | 0.000592 | 6.46E-05 | -1.9E-05 | 0.007119  |          |
| Constant  | -0.00115  | 0.000503 | -0.00148 | -0.00016 | -0.00552  | 0.104626 |

Table A30: Cholesky decomposition matrix for model in Table A5b (CHD)

|           | ti1      | ti2      | Age      | SIMD sc. | Fam. his. | Constant |
|-----------|----------|----------|----------|----------|-----------|----------|
| ti1       | 0.001704 |          |          |          |           |          |
| ti2       | -0.00223 | 0.003231 |          |          |           |          |
| Age       | 1.06E-05 | 2.87E-05 | 4.43E-05 |          |           |          |
| SIMD sc.  | -1.5E-05 | 3.77E-05 | 8.41E-06 | 9.53E-06 |           |          |
| Fam. his. | 5.77E-05 | -0.00048 | -0.00015 | -2.8E-05 | 0.013653  |          |
| Constant  | -0.00491 | 0.00292  | -0.00298 | -0.00075 | 0.005427  | 0.222996 |

Table A31: Cholesky decomposition matrix for model in Table A5b (Stroke)

|           | ti1       | ti2      | Age      | SIMD sc. | Fam. his. | Constant |
|-----------|-----------|----------|----------|----------|-----------|----------|
| ti1       | 0.000699  |          |          |          |           |          |
| ti2       | -0.00095  | 0.001526 |          |          |           |          |
| Age       | 6.88E-06  | 2.44E-05 | 3.22E-05 |          |           |          |
| SIMD sc.  | -1.94E-06 | 3.26E-06 | 2.00E-08 | 2.81E-06 |           |          |
| Fam. his. | 0.000114  | -0.00014 | 5.2E-05  | -1.5E-05 | 0.007743  |          |
| Constant  | -0.00247  | 0.000772 | -0.00219 | -7.9E-05 | -0.0054   | 0.15928  |

Table A32: Cholesky decomposition matrix for model in Table A5b (Intermittent claudication)

|           | ti1       | ti2      | Age      | SIMD sc. | Fam. his. | Constant |
|-----------|-----------|----------|----------|----------|-----------|----------|
| ti1       | 0.002869  |          |          |          |           |          |
| ti2       | -0.00465  | 0.010147 |          |          |           |          |
| Age       | -7.46E-07 | 0.000169 | 8.09E-05 |          |           |          |
| SIMD sc.  | -7.5E-05  | 0.000103 | 9.39E-06 | 1.11E-05 |           |          |
| Fam. his. | -0.0059   | 0.012305 | 0.000554 | 0.000302 | 0.034519  |          |
| Constant  | -0.00331  | -0.0081  | -0.00573 | -0.00086 | -0.04223  | 0.433269 |

Table A33: Cholesky decomposition matrix for model in Table A5b (Other heart condition)

|           | ti1       | ti2      | Age      | SIMD sc. | Fam. his. | Constant |
|-----------|-----------|----------|----------|----------|-----------|----------|
| ti1       | 0.001072  |          |          |          |           |          |
| ti2       | -0.00147  | 0.002248 |          |          |           |          |
| Age       | -3E-05    | 5.94E-05 | 4.23E-05 |          |           |          |
| SIMD sc.  | -4.57E-06 | 8.30E-06 | 1.61E-06 | 4.90E-06 |           |          |
| Fam. his. | 6.3E-05   | 0.000233 | 0.000118 | -1.9E-05 | 0.01287   |          |
| Constant  | -0.00099  | -0.0003  | -0.00274 | -0.00025 | -0.01138  | 0.195118 |

Table A34: Cholesky decomposition matrix for model in Table A5b (Heart failure)

|           | ti1      | ti2      | Age      | SIMD sc. | Fam. his. | Constant |
|-----------|----------|----------|----------|----------|-----------|----------|
| ti1       | 0.005537 |          |          |          |           |          |
| ti2       | -0.00661 | 0.008474 |          |          |           |          |
| Age       | -1.4E-05 | 0.000129 | 0.000245 |          |           |          |
| SIMD sc.  | -2E-05   | 1.41E-05 | 1.18E-05 | 3.26E-05 |           |          |
| Fam. his. | 0.007062 | -0.00838 | 0.00166  | -0.00011 | 0.045189  |          |
| Constant  | -0.01502 | 0.009929 | -0.01775 | -0.00146 | -0.1455   | 1.360667 |

Table A35: Cholesky decomposition matrix for model in Table A5c (CHD)

|           | ti1      | ti2       | Age      | SIMD sc. | Fam. his. | Constant |
|-----------|----------|-----------|----------|----------|-----------|----------|
| ti1       | 0.000234 |           |          |          |           |          |
| ti2       | -0.00034 | 0.000556  |          |          |           |          |
| Age       | 7.30E-06 | -1.41E-06 | 9.43E-06 |          |           |          |
| SIMD sc.  | 2.23E-07 | 1.53E-07  | 2.47E-07 | 1.24E-06 |           |          |
| Fam. his. | 3.33E-05 | -8.2E-05  | 2.36E-06 | 2.37E-06 | 0.002697  |          |
| Constant  | -0.00133 | 0.001218  | -0.00065 | -5.9E-05 | -0.0015   | 0.05111  |

Table A36: Cholesky decomposition matrix for model in Table A5c (Stroke)

|           | ti1       | ti2      | Age      | SIMD sc. | Fam. his. | Constant |
|-----------|-----------|----------|----------|----------|-----------|----------|
| ti1       | 0.001357  |          |          |          |           |          |
| ti2       | -0.00229  | 0.004284 |          |          |           |          |
| Age       | 1.93E-06  | 4.35E-05 | 4.09E-05 |          |           |          |
| SIMD sc.  | -6.81E-06 | 7.28E-06 | 1.07E-06 | 3.73E-06 |           |          |
| Fam. his. | -0.00122  | 0.00209  | -6.4E-05 | 1.87E-05 | 0.0112    |          |
| Constant  | -0.00273  | 0.00131  | -0.00266 | -0.0002  | 0.000198  | 0.190148 |

Table A37: Cholesky decomposition matrix for model in Table A5c (Stroke)

|           | ti1       | ti2      | Age      | SIMD sc. | Fam. his. | Constant |
|-----------|-----------|----------|----------|----------|-----------|----------|
| ti1       | 0.001357  |          |          |          |           |          |
| ti2       | -0.00229  | 0.004284 |          |          |           |          |
| Age       | 1.93E-06  | 4.35E-05 | 4.09E-05 |          |           |          |
| SIMD sc.  | -6.81E-06 | 7.28E-06 | 1.07E-06 | 3.73E-06 |           |          |
| Fam. his. | -0.00122  | 0.00209  | -6.4E-05 | 1.87E-05 | 0.0112    |          |
| Constant  | -0.00273  | 0.00131  | -0.00266 | -0.0002  | 0.000198  | 0.190148 |

Table A38: Cholesky decomposition matrix for model in Table A5c (Intermittent claudication)

|           | ti1      | ti2      | Age      | SIMD sc. | Fam. his. | Constant |
|-----------|----------|----------|----------|----------|-----------|----------|
| ti1       | 0.001435 |          |          |          |           |          |
| ti2       | -0.00218 | 0.003827 |          |          |           |          |
| Age       | 9.26E-05 | -9.4E-05 | 7.39E-05 |          |           |          |
| SIMD sc.  | 3.25E-05 | -5.5E-05 | 1.08E-05 | 1.07E-05 |           |          |
| Fam. his. | -0.00129 | 0.002581 | -6.1E-05 | -0.00018 | 0.016355  |          |
| Constant  | -0.01065 | 0.012432 | -0.00549 | -0.00104 | 0.005723  | 0.429304 |

Table A39: Cholesky decomposition matrix for model in Table A5c (Other heart condition)

|           | ti1      | ti2      | Age       | SIMD sc. | Fam. his. | Constant |
|-----------|----------|----------|-----------|----------|-----------|----------|
| ti1       | 0.000458 |          |           |          |           |          |
| ti2       | -0.00073 | 0.001295 |           |          |           |          |
| Age       | -1.1E-05 | 3.1E-05  | 2.07E-05  |          |           |          |
| SIMD sc.  | 7.57E-06 | -1.3E-05 | -1.92E-06 | 2.57E-06 |           |          |
| Fam. his. | -0.00012 | 0.000291 | 8.01E-05  | -2.3E-05 | 0.004562  |          |
| Constant  | -0.00086 | 0.000269 | -0.00131  | 3.36E-05 | -0.00646  | 0.092703 |

Table A40: Cholesky decomposition matrix for model in Table A5c (Heart failure)

|           | ti1       | ti2       | Age       | SIMD sc. | Fam. his. | Constant |
|-----------|-----------|-----------|-----------|----------|-----------|----------|
| ti1       | 0.000852  |           |           |          |           |          |
| ti2       | -0.0013   | 0.002279  |           |          |           |          |
| Age       | 2.99E-05  | -2.79E-06 | 3.4E-05   |          |           |          |
| SIMD sc.  | -5.12E-06 | 1.1E-05   | -6.32E-07 | 5.37E-06 |           |          |
| Fam. his. | 0.000209  | -8.1E-05  | 0.0002    | -4.3E-05 | 0.011249  |          |
| Constant  | -0.00414  | 0.002906  | -0.00239  | -0.00012 | -0.01719  | 0.183767 |

Table A41: Cholesky decomposition matrix for model in Table A5d (CHD)

|           | ti1      | ti2      | Age      | SIMD sc. | Fam. his. | Constant |
|-----------|----------|----------|----------|----------|-----------|----------|
| ti1       | 0.002913 |          |          |          |           |          |
| ti2       | -0.0036  | 0.004895 |          |          |           |          |
| Age       | 5.66E-05 | -3.5E-05 | 4.96E-05 |          |           |          |
| SIMD sc.  | 2.5E-05  | -3.4E-05 | 4.63E-06 | 1.24E-05 |           |          |
| Fam. his. | -0.00075 | 0.000935 | 0.000256 | 3.36E-05 | 0.02192   |          |
| Constant  | -0.01391 | 0.014156 | -0.00366 | -0.00082 | -0.02412  | 0.327691 |

Table A42: Cholesky decomposition matrix for model in Table A5d (Stroke)

|           | ti1       | ti2      | Age      | SIMD sc.  | Fam. his. | Constant |
|-----------|-----------|----------|----------|-----------|-----------|----------|
| ti1       | 0.000747  |          |          |           |           |          |
| ti2       | -0.00099  | 0.001517 |          |           |           |          |
| Age       | 6.09E-06  | 1.84E-05 | 1.9E-05  |           |           |          |
| SIMD sc.  | -5.94E-06 | 1.05E-05 | 2.83E-07 | 2.86E-06  |           |          |
| Fam. his. | -1.1E-05  | -5.6E-05 | 6.19E-05 | -5.67E-06 | 0.005877  |          |
| Constant  | -0.0024   | 0.000977 | -0.00136 | -0.00011  | -0.00624  | 0.109062 |



Table A43: Cholesky decomposition matrix for model in Table A5d (Intermittent claudication)

|           | ti1      | ti2       | Age      | SIMD sc. | Fam. his. | Constant |
|-----------|----------|-----------|----------|----------|-----------|----------|
| ti1       | 0.005439 |           |          |          |           |          |
| ti2       | -0.00724 | 0.011061  |          |          |           |          |
| Age       | 0.000127 | -4.25E-06 | 0.000106 |          |           |          |
| SIMD sc.  | 0.00021  | -0.00011  | 3.52E-05 | 4.52E-05 |           |          |
| Fam. his. | -0.00985 | 0.017791  | 0.000734 | 0.000311 | 0.063795  |          |
| Constant  | -0.02696 | 0.014837  | -0.00872 | -0.00495 | -0.05998  | 0.871108 |

Table A44: Cholesky decomposition matrix for model in Table A5d (Other heart condition)

|           | ti1      | ti2      | Age      | SIMD sc. | Fam. his. | Constant |
|-----------|----------|----------|----------|----------|-----------|----------|
| ti1       | 0.001881 |          |          |          |           |          |
| ti2       | -0.00226 | 0.002897 |          |          |           |          |
| Age       | 2.12E-06 | 3.08E-05 | 3.17E-05 |          |           |          |
| SIMD sc.  | -1.8E-05 | 2.22E-05 | 7.60E-07 | 5.82E-06 |           |          |
| Fam. his. | -0.00051 | 0.000802 | 1.61E-06 | 8.43E-06 | 0.014557  |          |
| Constant  | -0.0045  | 0.002861 | -0.00213 | -0.00021 | -0.00687  | 0.168674 |

Table A45: Cholesky decomposition matrix for model in Table A5d (Heart failure)

|           | ti1      | ti2      | Age      | SIMD sc. | Fam. his. | Constant |
|-----------|----------|----------|----------|----------|-----------|----------|
| ti1       | 0.004548 |          |          |          |           |          |
| ti2       | -0.00526 | 0.006544 |          |          |           |          |
| Age       | 0.000148 | -0.00012 | 6.26E-05 |          |           |          |
| SIMD sc.  | 0.000108 | -1E-04   | 8.03E-06 | 1.95E-05 |           |          |
| Fam. his. | -0.00054 | -6.5E-05 | 0.000191 | -0.00013 | 0.040833  |          |
| Constant  | -0.02545 | 0.024304 | -0.00488 | -0.0015  | -0.02375  | 0.466341 |

Table A46: Cholesky decomposition matrix for model in Table A6a (non-fatal CHD)

|           | ti1       | ti2       | Age       | SIMD sc. | Fam. his. | Constant |
|-----------|-----------|-----------|-----------|----------|-----------|----------|
| ti1       | 110.6293  |           |           |          |           |          |
| ti2       | -223.332  | 520.3348  |           |          |           |          |
| Age       | -1.84E+00 | 9.87E+00  | 10.46827  |          |           |          |
| SIMD sc.  | 5.00E-01  | -1.26E+00 | -2.78E-02 | 1.26E+00 |           |          |
| Fam. his. | 69.02028  | -158.226  | -18.3664  | 7.62E-01 | 2217.569  |          |
| Constant  | -299.578  | 260.9194  | -512.02   | -29.9892 | 73.61406  | 27551.52 |

Table A47: Cholesky decomposition matrix for model in Table A6a (non-fatal CBVD)

|           | ti1       | ti2      | Age      | SIMD sc. | Fam. his. | Constant |
|-----------|-----------|----------|----------|----------|-----------|----------|
| ti1       | 491.8385  |          |          |          |           |          |
| ti2       | -917.366  | 1862.982 |          |          |           |          |
| Age       | -20.948   | 52.19749 | 34.82615 |          |           |          |
| SIMD sc.  | -1.58E+00 | 6.72E+00 | 2.62E+00 | 3.540867 |           |          |
| Fam. his. | -4.58151  | -139.728 | 35.95839 | -22.1553 | 7226.995  |          |
| Constant  | -388.898  | -93.4803 | -1881.86 | -219.977 | -3933.45  | 110094.3 |

Table A48: Cholesky decomposition matrix for model in Table A6a (fatal CVD)

|           | ti1       | ti2       | Age       | SIMD sc. | Fam. his. | Constant |
|-----------|-----------|-----------|-----------|----------|-----------|----------|
| ti1       | 287.3269  |           |           |          |           |          |
| ti2       | -454.53   | 871.4238  |           |          |           |          |
| Age       | 2.54E+01  | -4.33E+01 | 32.50656  |          |           |          |
| SIMD sc.  | -1.55E+00 | 4.19E+00  | -7.13E-01 | 4.10E+00 |           |          |
| Fam. his. | -282.262  | 699.2308  | -11.8609  | 2.43E+00 | 9225.866  |          |
| Constant  | -2225.1   | 3458.229  | -1784.69  | -65.4644 | -1368.86  | 105276.2 |

Table A49: Cholesky decomposition matrix for model in Table A6a (fatal non-CVD)

|           | ti1       | ti2       | Age       | SIMD sc.  | Fam. his. | Constant |
|-----------|-----------|-----------|-----------|-----------|-----------|----------|
| ti1       | 564.796   |           |           |           |           |          |
| ti2       | -877.975  | 1671.553  |           |           |           |          |
| Age       | 1.22E+01  | -3.08E+01 | 64.52869  |           |           |          |
| SIMD sc.  | -2.37E-01 | -1.95E+00 | -1.13E-01 | 7.18E+00  |           |          |
| Fam. his. | -260.844  | -159.267  | 258.182   | -3.68E+01 | 25937.41  |          |
| Constant  | -2428.75  | 4335.331  | -3399.22  | -192.728  | -14825.5  | 192596.7 |

Table A50: Cholesky decomposition matrix for model in Table A6b (non-fatal CHD)

|           | ti1       | ti2       | Age       | SIMD sc. | Fam. his. | Constant |
|-----------|-----------|-----------|-----------|----------|-----------|----------|
| ti1       | 1974.068  |           |           |          |           |          |
| ti2       | -5329.28  | 14590.2   |           |          |           |          |
| Age       | 5.34E+02  | -1.46E+03 | 170.6693  |          |           |          |
| SIMD sc.  | -1.73E+02 | 4.80E+02  | -4.88E+01 | 1.82E+01 |           |          |
| Fam. his. | -12380.7  | 34248.04  | -3423.89  | 1148.822 | 85633.54  |          |
| Constant  | -23205.6  | 62879.94  | -7557.32  | 2.03E+03 | 143852    | 341257.6 |

Table A51: Cholesky decomposition matrix for model in Table A6b (non-fatal CBVD)

|           | ti1      | ti2      | Age       | SIMD sc.  | Fam. his. | Constant |
|-----------|----------|----------|-----------|-----------|-----------|----------|
| ti1       | 364.5978 |          |           |           |           |          |
| ti2       | -561.626 | 1067.69  |           |           |           |          |
| Age       | 8.484686 | -4.48079 | 32.95695  |           |           |          |
| SIMD sc.  | -17.6807 | 1.65E+01 | 3.90E+00  | 9.261196  |           |          |
| Fam. his. | 92.03296 | 257.3483 | -1.43E+01 | -1.17E+02 | 10339.79  |          |
| Constant  | -1482.85 | 1622.071 | -1865.68  | -286.699  | -1921.16  | 113819.8 |

Table A52: Cholesky decomposition matrix for model in Table A6b (fatal CVD)

|           | ti1       | ti2      | Age       | SIMD sc. | Fam. his. | Constant |
|-----------|-----------|----------|-----------|----------|-----------|----------|
| ti1       | 466.4651  |          |           |          |           |          |
| ti2       | -731.87   | 1370.365 |           |          |           |          |
| Age       | 3.61E+01  | -37.9897 | 61.01627  |          |           |          |
| SIMD sc.  | -6.03E+00 | 1.18E+01 | -1.20E+00 | 5.79E+00 |           |          |
| Fam. his. | -232.879  | 704.4573 | 2.46E+02  | 1.48E+01 | 13827.75  |          |
| Constant  | -3418.26  | 3871.214 | -3528.06  | -108.431 | -18499.7  | 218775.7 |

Table A53: Cholesky decomposition matrix for model in Table A6b (fatal non-CVD)

|           | ti1       | ti2       | Age       | SIMD sc. | Fam. his. | Constant |
|-----------|-----------|-----------|-----------|----------|-----------|----------|
| ti1       | 585.1934  |           |           |          |           |          |
| ti2       | -860.987  | 1534.322  |           |          |           |          |
| Age       | -1.27E+01 | -6.08E-01 | 98.38825  |          |           |          |
| SIMD sc.  | -2.75E+00 | 7.90E+00  | -1.83E+00 | 1.03E+01 |           |          |
| Fam. his. | 194.8229  | -458.174  | 211.0032  | -45.4992 | 20036.14  |          |
| Constant  | -1298.57  | 2611.277  | -5204.9   | -173.528 | -16101.9  | 293698.5 |

Table A54: Cholesky decomposition matrix for model in Table A6c

|           | ti1       | ti2      | Age       | SIMD sc. | Fam. his. | Constant |
|-----------|-----------|----------|-----------|----------|-----------|----------|
| ti1       | 1928.527  |          |           |          |           |          |
| ti2       | -2182.32  | 2623.261 |           |          |           |          |
| Age       | -6.64E+01 | 9.01E+01 | 81.79826  |          |           |          |
| SIMD sc.  | -8.98E+00 | 8.84E+00 | -3.28E-01 | 1.13E+01 |           |          |
| Fam. his. | -1664.72  | 1803.166 | 206.9212  | -44.8729 | 26691.6   |          |
| Constant  | -4767.18  | 4054.117 | -4563.5   | -212.089 | -9528.91  | 305362.2 |

Table A55: Cholesky decomposition matrix for model in Table A6d

|           | ti1      | ti2       | Age       | SIMD sc. | Fam. his. | Constant |
|-----------|----------|-----------|-----------|----------|-----------|----------|
| ti1       | 7948.634 |           |           |          |           |          |
| ti2       | -9946.35 | 14008.03  |           |          |           |          |
| Age       | 3.33E+01 | 145.9542  | 256.7264  |          |           |          |
| SIMD sc.  | 1.51E+01 | -4.41E+01 | -1.55E+00 | 3.30E+01 |           |          |
| Fam. his. | -1305.24 | 3012.042  | 304.1178  | -603.492 | 98476.88  |          |
| Constant  | -33236   | 25913.37  | -16488.6  | -701.861 | -24693.6  | 1230386  |

Table A56: Cholesky decomposition matrix for model in Table A6e

|           | ti1      | ti2       | Age      | SIMD sc. | Fam. his. | Constant |
|-----------|----------|-----------|----------|----------|-----------|----------|
| ti1       | 2803.303 |           |          |          |           |          |
| ti2       | -3796.26 | 5472.314  |          |          |           |          |
| Age       | 57.77047 | -23.4372  | 128.3375 |          |           |          |
| SIMD sc.  | 2.89E+01 | -3.10E+01 | 5.64E+00 | 1.52E+01 |           |          |
| Fam. his. | 961.1155 | -1232.25  | 781.685  | -58.8688 | 35371.38  |          |
| Constant  | -16976.6 | 18323.64  | -8480.98 | -900.972 | -64442.5  | 648552.4 |

Table A57: Cholesky decomposition matrix for model in Table A6f

|           | ti1      | ti2       | Age      | SIMD sc.  | Fam. his. | Constant |
|-----------|----------|-----------|----------|-----------|-----------|----------|
| ti1       | 10606.79 |           |          |           |           |          |
| ti2       | -12042.9 | 14774.05  |          |           |           |          |
| Age       | 2.41E+02 | -60.7626  | 235.9434 |           |           |          |
| SIMD sc.  | 1.87E+01 | -1.30E+01 | 7.65E+00 | 3.95E+01  |           |          |
| Fam. his. | 2558.769 | -3268.72  | 848.302  | -1.60E+02 | 82288.52  |          |
| Constant  | -58715   | 50174.18  | -16693.2 | -1820.52  | -96858.7  | 1428460  |

Figure A1: Observed proportions of HF hospitalisations over time since first event for men (circles = proportions following non-fatal CHD event, squares = proportions following non-fatal CBVD event)

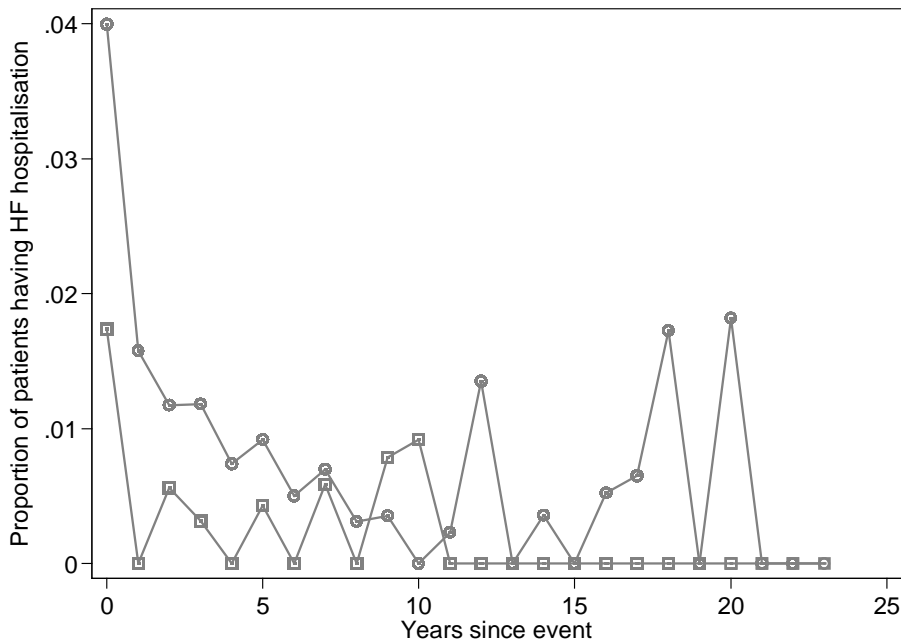

Figure A2: Observed mean costs over time since screening for men (circles = costs before non-fatal CHD event, squares = costs before non-fatal CBVD event, triangles = costs before fatal CVD event, crosses = costs before fatal non-CVD event)

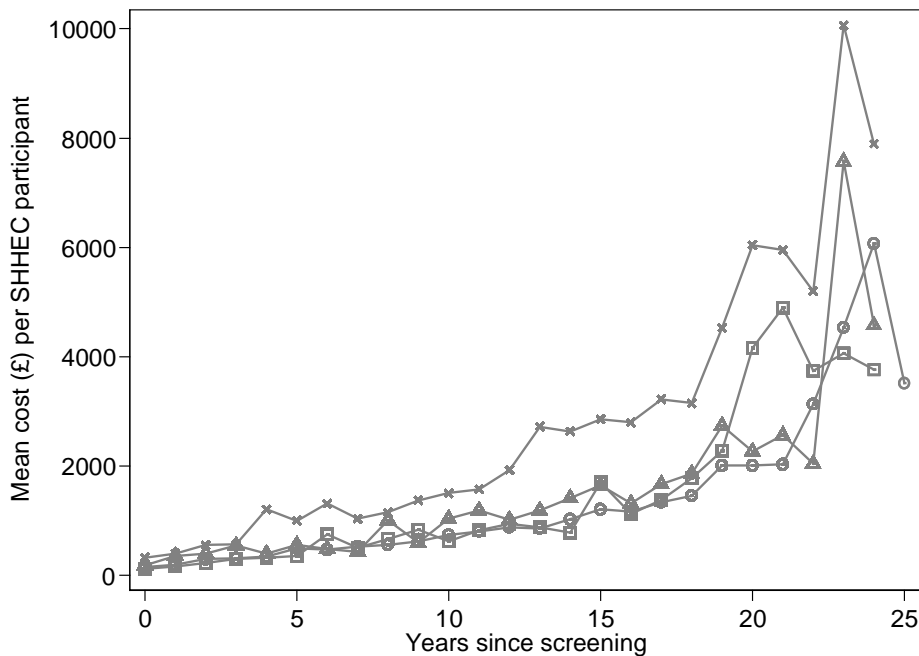

Figure A3: Observed mean costs over time since first event for men (circles = costs after non-fatal CHD event, squares = costs after non-fatal CBVD event)

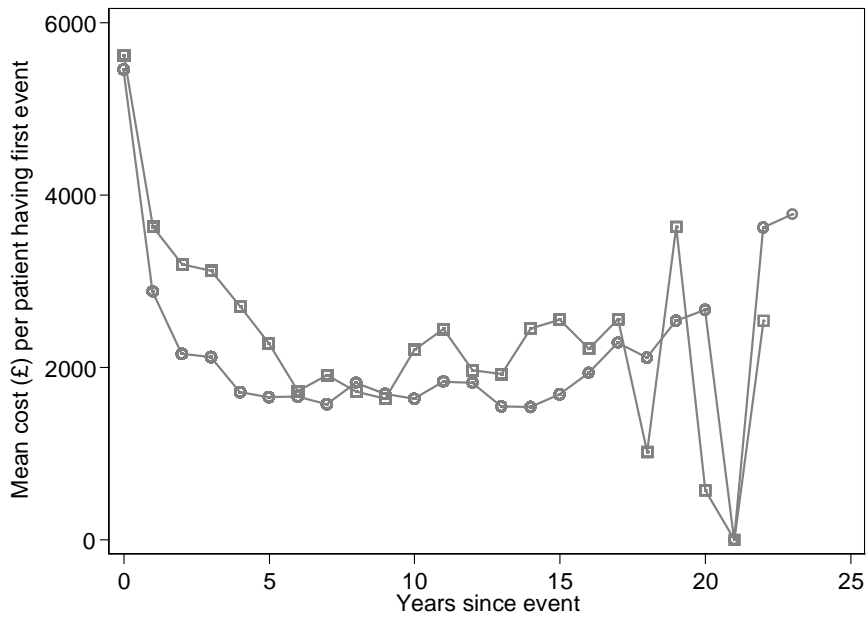

## REFERENCES

1. **Lewsey JD**, Lawson KD, Ford I, *et al.* A Cardiovascular Disease Policy Model for Scotland: Part 1 – predicting life expectancy accounting for socio-economic deprivation.
2. **Lawson KD**, Lewsey JL, Ford I, *et al.* A Cardiovascular Disease Policy Model for Scotland: Part 2 – preparing for economic evaluation.
3. **Putter H**, Fiocco M and Geskus RB. Tutorial in biostatistics: Competing risks and multi-state models. *Statistics in Medicine* 2007;**26**:2389-2430.
4. **Clarke PM**, Hayes AJ, Glasziou PG, *et al.* Using the EQ-5D index score as a predictor of outcomes in patients with type 2 diabetes. *Medical Care* 2009;**47**:61-8.
5. **Harrell FE, Jr.** Regression Modeling Strategies: With Applications to Linear Models, Logistic Regression, and Survival Analysis. New York: Springer, 2001, p23.
